# Supplementary material for: Randomised controlled trial of a financial incentive for increasing the number of daily walking steps: study protocol
Source: PubMed Central journal article supplement — BMJ Open. 2019 Jun 19;9(6):e026086. doi: 10.1136/bmjopen-2018-026086 (PMC6589016; doi:10.1136/bmjopen-2018-026086), 2019-06-19
Supplement: bmjopen-2018-026086.draft_revisions.pdf [file bmjopen-2018-026086.draft_revisions.pdf]

# BMJ Open

BMJ Open is committed to open peer review. As part of this commitment we make the peer review history of every article we publish publicly available.

When an article is published we post the peer reviewers' comments and the authors' responses online. We also post the versions of the paper that were used during peer review. These are the versions that the peer review comments apply to.

The versions of the paper that follow are the versions that were submitted during the peer review process. They are not the versions of record or the final published versions. They should not be cited or distributed as the published version of this manuscript.

BMJ Open is an open access journal and the full, final, typeset and author-corrected version of record of the manuscript is available on our site with no access controls, subscription charges or pay-per-view fees (<http://bmjopen.bmj.com>).

If you have any questions on BMJ Open's open peer review process please email [info.bmjopen@bmj.com](mailto:info.bmjopen@bmj.com)

# BMJ Open

## Randomized controlled trial of a financial incentive for increasing the number of daily walking steps: Study protocol

|                               |                                                                                                                                                                                                                                                                                                                                                                                                                                                                                                                                                                                                                                                                                                                                                                                                                                                                                                             |
|-------------------------------|-------------------------------------------------------------------------------------------------------------------------------------------------------------------------------------------------------------------------------------------------------------------------------------------------------------------------------------------------------------------------------------------------------------------------------------------------------------------------------------------------------------------------------------------------------------------------------------------------------------------------------------------------------------------------------------------------------------------------------------------------------------------------------------------------------------------------------------------------------------------------------------------------------------|
| Journal:                      | <i>BMJ Open</i>                                                                                                                                                                                                                                                                                                                                                                                                                                                                                                                                                                                                                                                                                                                                                                                                                                                                                             |
| Manuscript ID                 | bmjopen-2018-026086                                                                                                                                                                                                                                                                                                                                                                                                                                                                                                                                                                                                                                                                                                                                                                                                                                                                                         |
| Article Type:                 | Protocol                                                                                                                                                                                                                                                                                                                                                                                                                                                                                                                                                                                                                                                                                                                                                                                                                                                                                                    |
| Date Submitted by the Author: | 16-Aug-2018                                                                                                                                                                                                                                                                                                                                                                                                                                                                                                                                                                                                                                                                                                                                                                                                                                                                                                 |
| Complete List of Authors:     | Tomata, Yasutake; Tohoku University School of Public Health, Graduate School of Medicine,<br>Tanji, Fumiya; Tohoku University Graduate School of Medicine, Division of Epidemiology, Department of Health Informatics and Public Health<br>Nurrika, Dieta<br>Liu, Yingxu<br>Abe, Saho<br>Matsumoto, Koichi<br>Zhang, Shu<br>Kotaki, Yumika<br>Matsuyama, Sanae<br>Lu, Yukai<br>Sugawara, Yumi; 2. Division of Epidemiology, Department of Health Informatics and Public Health, Tohoku University School of Public Health, Graduate School of Medicine<br>Bando, Shino<br>Yamazaki, Teiichiro<br>Otsuka, Tatsui<br>Sone, Toshimasa; Tohoku University Graduate School of Medicine, Division of Epidemiology, Department of Public Health and Forensic Medicine<br>Tsuji, Ichiro; Tohoku University Graduate School of Medicine, Division of Epidemiology, Department of Public Health and Forensic Medicine |
| Keywords:                     | EPIDEMIOLOGY, PUBLIC HEALTH, PREVENTIVE MEDICINE, SPORTS MEDICINE                                                                                                                                                                                                                                                                                                                                                                                                                                                                                                                                                                                                                                                                                                                                                                                                                                           |
|                               |                                                                                                                                                                                                                                                                                                                                                                                                                                                                                                                                                                                                                                                                                                                                                                                                                                                                                                             |

SCHOLARONE™  
Manuscripts

**Title:**

**Randomized controlled trial of a financial incentive for increasing the number of daily walking steps: Study protocol**

**Authors:**

Yasutake Tomata<sup>1</sup>, Fumiya Tanji<sup>1</sup>, Dieta Nurrika<sup>1</sup>, Yingxu Liu<sup>1</sup>, Saho Abe<sup>1</sup>,  
Koichi Matsumoto<sup>1</sup>, Shu Zhang<sup>1</sup>, Yumika Kotaki<sup>1</sup>, Sanae Matsuyama<sup>1</sup>,  
Yukai Lu<sup>1</sup>, Yumi Sugawara<sup>1</sup>, Shino Bando<sup>1</sup>, Teiichiro Yamazaki<sup>1</sup>,  
Tatsui Otsuka<sup>1</sup>, Toshimasa Sone<sup>2</sup>, Ichiro Tsuji<sup>1</sup>

**Author's affiliations:**

1: Division of Epidemiology, Department of Health Informatics and Public Health, Tohoku University School of Public Health, Graduate School of Medicine, Sendai, Japan.

2: Department of Rehabilitation, Faculty of Health Science, Tohoku Fukushi University, Sendai, Japan.

**Corresponding:**

Yasutake Tomata

Division of Epidemiology, Department of Health Informatics and Public Health, Tohoku University School of Public Health, Graduate School of Medicine 2-1, Seiryō-machi, Aoba-ku, Sendai, Miyagi 980-8575, Japan.

Phone: +81-22-717-8123 Fax: +81-22-717-8125.

E-mail: [y-tomata@med.tohoku.ac.jp](mailto:y-tomata@med.tohoku.ac.jp)

(Study protocol ver. 1)  
page. 2

1     **Word count:**

2     # Word count for abstract: words: 238

3     # Word count for text: words: 2,704

4     # Number of references: 18

5     # Number of tables: 2

6     # Number of figure: 1

7     # Number of supplementary tables: 0

**ABSTRACT**

**Introduction:** Physical activity is one of the major modifiable factors for promotion of public health. Although it has been reported that financial incentives would be effective for promoting health behaviors such as smoking cessation or attendance for cancer screening, few randomized controlled trials (RCTs) have examined the effect of financial incentives for increasing the number of daily steps among individuals in a community setting. The aim of this study is to investigate the effects of financial incentives for increasing the number of daily steps among community-dwelling adults in Japan.

**Methods and analysis:** This study will be a two-arm, parallel-group RCT. We will recruit community-dwelling adults who have no exercise habits in a suburban area (Nakayama) of Sendai city, Japan, using leaflets and posters. Participants that meet the inclusion criteria will be randomly allocated to an intervention group or a waitlist control group. The intervention group will be offered a financial incentive (a chance to get shopping points) if participants increase their daily steps from their baseline. The primary outcome will be the average increase in the number of daily steps (at 3-6 weeks and 6-9 weeks) relative to the average number of daily steps at the baseline (0-3 weeks).

**Ethics and dissemination:** This study has been ethically approved by the research ethics committee of Tohoku University Graduate School of Medicine, Japan (No. 2018-1-171). The results will be submitted and published in a

(Study protocol ver. 1)  
page. 4

- 1 peer-reviewed scientific journal.
- 2 **Registration:** UMIN000033276; Pre-results.

For peer review only

1  
2  
3  
4 **1 Strengths and limitations of this study**

- 5  
6 2 ➤ This trial will examine the effectiveness of a financial incentive for  
7  
8  
9 3 increasing the number of daily walking steps.  
10  
11 4 ➤ The present study would be first Asian trial.  
12  
13  
14 5 ➤ Limitations include the fact that the intervention will be only one type of  
15  
16 6 financial incentive.  
17  
18  
19 7 ➤ Only short-term effects during 9 weeks will be evaluated.  
20  
21  
22 8

## 1 INTRODUCTION

2 Physical activity is a major modifiable factor that has benefits in terms of  
3 physical and mental health<sup>1</sup>. Therefore public health strategies to increase  
4 physical activity are implemented worldwide<sup>2</sup>. In the Japanese National  
5 Health Promotion Movement ("Health Japan 21"), a higher number of daily  
6 walking steps is a target for physical activity<sup>3 4</sup>.

7       Recently, to encourage individuals who are not lifestyle-conscious to  
8 increase the number of steps they walk daily, it has been suggested that  
9 offering them financial incentives might be an effective approach. The  
10 Ministry of Health, Labor and Welfare in Japan has provided a guideline for  
11 promotion of public health using financial incentives<sup>5</sup>. One such incentive is  
12 the introduction of a "health point system" in which local governments  
13 provide "shopping points" that can be redeemed in local stores when an  
14 individual achieves a healthy lifestyle goal such as an increase in the number  
15 of daily walking steps.

16       A systematic review (meta-analysis) has suggested that financial  
17 incentives would be effective for promotion of health behaviors such as  
18 smoking cessation, or attendance for vaccination or cancer screening<sup>6</sup>.

19 Although a few randomized controlled trials (financial incentives vs. no  
20 intervention) have examined the effect of financial incentives for increasing  
21 the amount of daily steps by individuals in a community setting, the results



1  
2  
3  
4  
5  
6  
7  
8  
9  
10  
11  
12  
13  
14  
15  
16  
17  
18  
19  
20  
21  
22  
23  
24  
25  
26  
27  
28  
29  
30  
31  
32  
33  
34  
35  
36  
37  
38  
39  
40  
41  
42  
43  
44  
45  
46  
47  
48  
49  
50  
51  
52  
53  
54  
55  
56  
57  
58  
59  
60

1 were not consistent<sup>7 8</sup>.

2           The aim of the present study will be to examine the effect of offering a  
3 financial incentive for increasing the number of daily walking steps in a  
4 community setting.

For peer review only

## 1      **METHODS**

### 2      ***Study design***

3      The design is a randomized controlled trial (single-center, single-blind,  
4      parallel-group study) in which subjects are randomly assigned to one of two  
5      groups: an intervention group or a waitlist control group.

### 7      ***Recruitment***

8      In August 2018, two types of leaflets (preliminary notice, and information  
9      about recruitment) related to the study will be distributed to individual  
10     households in the Nakayama area, Aoba-ku, Sendai city, Japan. Posters giving  
11     details about recruitment will also be displayed in the Nakayama area.  
12     Inclusion criteria and exclusion criteria will be stated on the entry form.  
13     Applicants who meet the inclusion criteria and not the exclusion criteria will  
14     be able to apply by Web application, FAX, or telephone. We will accept 80  
15     applicants.

### 17     ***Inclusion criteria***

18     Individuals will be able to apply for participation in this study if they meet all  
19     of the following criteria: 1) Men and women (aged 20 years or more) living in  
20     the Nakayama area, 2) Possession of an IC Card for Community Development  
21     in the Nakayama area (*Nakayama Machi-dukuri IC Card*), 3) Ability to walk

1 unaided without using a cane, Zimmer frame, or wheelchair.

2           According to the 2015 Population Census, the number of adults (aged  
3 20 years or more) living in Nakayama area was 13,734 persons.

#### 4 5 ***Exclusion criteria***

6 Individuals who meet any of the following criteria will not be able to  
7 participate in the study: 1) Individuals whose physical activity is restricted by  
8 a physician, 2) History of heart attack or stroke within the last 6 months, 3)  
9 Blood pressure exceeding 180 mmHg systolic or 110 mmHg diastolic, 4)  
10 Already habitually exercising (task of  $\geq 4$  metabolic equivalents) more than  
11 twice per week.

#### 12 13 ***Study procedure***

14 **Figure 1** illustrates the flow of the study procedure.

15           In the briefing session on September 2018, chosen subjects will provide  
16 informed consent to participate in the study. Blood pressure measurement, an  
17 interview using a questionnaire, and explanation about use of a pedometer  
18 will then be performed. At the briefing session, all participants will be  
19 provided with a pedometer.

20           The day after the briefing session will be the start date of steps  
21 evaluation. We will perform evaluation and feedback about daily steps every 3

1 weeks. All participants must wear the pedometer every day during the study period (12 weeks).

For all participants, the number of daily steps at the baseline will be measured in first 3 weeks of the study period (**Table 1**). Then, participants who provide their data of daily steps will be randomly assigned to the intervention group or the control group. At this stage, we assume that approximately 74 persons (i.e. the target sample size) would be included in the random assignment.

During the next 3 weeks (intervention period), the participants in the intervention group will be given a financial incentive if they achieve their daily steps goals.

On the other hand, the control group will be given a chance to gain a financial incentive (mentioned above) in the last three weeks, and thereby all participants will have a fair opportunity to gain such an incentive.

### ***Intervention***

The intervention is a financial incentive in the form of shopping points, which can be redeemed at stores in the study area (Nakayama area). Two kinds of financial incentive will be offered:

1. If the average number of daily steps in the intervention period is  $\geq 6,000$ , shopping points worth 1,000 Japanese yen will be awarded.

1  
2  
3  
4 1 2. If the average number of daily steps during the intervention period  
5  
6 2 increases by  $\geq 1,000$  from the baseline level, shopping points worth 1,000  
7  
8 3 Japanese yen will be awarded.

10  
11 4 For example, if a person keeps walking 6,500 steps during both the baseline  
12  
13 5 and intervention periods, only financial incentive “1” (1,000 Japanese yen  
14  
15 6 worth of points) will be awarded. If a person walks 3,000 steps in the baseline  
16  
17 7 period and 4,000 steps in the intervention period, only financial incentive “2”  
18  
19 8 (1,000 Japanese yen worth of points) will be awarded. If a person walks 5,000  
20  
21 9 steps in the baseline period and 7,000 steps in the intervention period, both  
22  
23 10 financial incentives “1” and “2” (2,000 Japanese yen worth of points) will be  
24  
25 11 awarded.  
26  
27  
28  
29  
30  
31

### 32 12

### 33

### 34 13 *Waitlist control group*

### 35

### 36

37 14 The waitlist control group is also given a financial incentive in the last three  
38  
39 15 weeks (**Figure 1**).  
40  
41

### 42 16

### 43

### 44

### 45 17 *Randomization*

### 46

47 18 After confirming their eligibility, enrolled participants will be assigned to one  
48  
49 19 of the two groups (1:1 allocation) based on the permuted block method (block  
50  
51 20 size=2) by computer-generated randomization. The allocation sequence will  
52  
53 21 be managed by a researcher in the data management section.  
54  
55  
56  
57  
58  
59  
60

## 1 **Blinding**

2 A blinded endpoint evaluation design will be applied.

3 In addition, statistical analyses will be blinded to the assignment. The  
4 researcher in the data management section with knowledge of the assignment  
5 detail will not conduct the statistical analysis.

6 Only the researcher in the data management section can access the  
7 original data.

## 9 **Baseline characteristics**

10 Baseline characteristics will be assessed on the date of the briefing session.

11 We will conduct an interview to obtain information about medical  
12 history, frailty (the Kihon checklist), physical activity, transportation when  
13 going out, education level, work, subjective economic status, time affluence  
14 (having spare time), pain, and falling. We will also measure the blood  
15 pressure of each participant.

16 History of diseases will include stroke, hypertension, myocardial  
17 infarction, renal disease, hepatic disease, diabetes mellitus, arthritis,  
18 osteoporosis, cancer, and dyslipidemia.

19 Frailty will be assessed by the Kihon checklist (devised by the  
20 Japanese Ministry of Health, Labor and Welfare), which is a 25-item  
21 self-administered questionnaire designed to identify frail elderly individuals<sup>9</sup>.

1  
2  
3  
4 1 Previous studies have reported the validity of the Kihon checklist<sup>10-13</sup>.

5  
6 2 Physical activity will be assessed by the Japan Public Health Centre  
7  
8 3 Physical Activity Questionnaire (JPHC PAQ)<sup>14 15</sup>. This questionnaire includes  
9  
10 4 information about the average daily amount of time and frequency spent in  
11  
12 5 work-related (including commuting and housework) physical activity,  
13  
14 6 leisure-time physical activity, and sleep<sup>14</sup>. The total physical activity level is  
15  
16 7 calculated as metabolic equivalents of task-hours per day. The correlation  
17  
18 8 between metabolic equivalents estimated by this questionnaire and daily  
19  
20 9 activities reported in 24-hour records was 0.69<sup>14</sup>.

21  
22  
23  
24  
25  
26 10 Transportation when going out will be assessed by asking the question  
27  
28 11 “What kinds of transportation did you use more than twice per week when you  
29  
30 12 went out in the last 1 month?”, for which available responses were: “walking”,  
31  
32 13 “bicycle”, “motorbike”, “car”, “train”, “bus”, “taxi”, or “other”.

33  
34  
35  
36  
37 14 Education level will be assessed by asking the question applied in the  
38  
39 15 2010 Population Census (Japan) “Please indicate the last school you graduated  
40  
41 16 from.”, for which available responses were: “primary school or junior high  
42  
43 17 school”, “senior high school or middle school (under the old system of  
44  
45 18 education)”, “junior college or higher professional school”, “college,  
46  
47 19 university or graduate school”<sup>16</sup>.

48  
49  
50  
51  
52 20 Work will be assessed by asking the question “Do you do any paid work  
53  
54 21 now?”, for which available responses were: “≥4 times/week”, “2-3

1 times/week”, “1 time/week”, “1-3 times/month”, “few times/year”, or “none”.

2 Subjective household economic status will be assessed by asking the  
3 question “How do you feel about your current household economic situation?”,  
4 for which available responses will be: “most affluent”, “more affluent”,  
5 “neither more nor less”, “less affluent”, or “non-affluent”.

6 Time affluence (having spare time) will be assessed by asking the  
7 question “Do you have time affluence for rest or leisure in daily life?  
8 Alternatively, do not you have time affluence for work, housework, or  
9 studies?”, for which available responses will be: “more affluent”, “little  
10 affluent”, “less affluent”, or “non-affluent”<sup>17</sup>.

11 Falling will be assessed based on question no. 9 of the Kihon checklist  
12 “Have you experienced a fall in the last year?”<sup>9</sup>.

13 Pain will be assessed based on the question “How much pain have you  
14 experienced during the last 1 month?”, for which available responses will be:  
15 “none,” “very mild,” “mild,” “moderate,” “severe,” or “very severe”<sup>18</sup>.

16 Location of the pain will be also ascertained, for which available responses  
17 will be: “shoulder”, “lower back” or “knee”.

18 Blood pressure in a seated position after 3 min of rest will be assessed  
19 using an automated sphygmomanometer HEM-1040 (Omron, Kyoto, Japan).  
20 Two measurements taken 3 min apart will be averaged for analysis.

21



1  
2  
3  
4 1 ***Outcome measurements***  
5

6 2 Daily steps will be counted by a pedometer FS-800 (ESTERA Corporation.  
7  
8 3 Saitama, Japan) containing a 3-axis acceleration sensor. Data on daily steps  
9  
10 4 will be automatically recorded in the pedometer for 90 days, and the data will  
11  
12 5 be transferred from the pedometer to a personal computer via the Near Field  
13  
14 6 Communication function.  
15  
16

17  
18  
19 7 Incident falls will be assessed based on question no. 9 of the Kihon  
20  
21 8 checklist. Because the assessment will be conducted every three weeks for  
22  
23 9 follow-up, we will modify the timing of this question to “Have you fallen in  
24  
25 10 the past three weeks?”. Incident falls are defined as new episodes of falling  
26  
27 11 after the baseline.  
28  
29  
30

31  
32 12 Incident pain will be assessed based on the question “How much pain  
33  
34 13 have you experienced during the past three weeks?”, and expressed as a  
35  
36 14 six-point verbal rating scale: “none,” “very mild,” “mild,” “moderate,”  
37  
38 15 “severe,” and “very severe”. Incident pain is defined as worsening of pain  
39  
40 16 severity after the baseline.  
41  
42  
43  
44

45 17  
46  
47 18 ***Primary outcome***  
48

49  
50 19 The primary outcome is the average increase in the number of daily steps  
51  
52 20 compared with the average number during the baseline period (**Table 1, Table**  
53  
54 21 **2**).  
55  
56  
57  
58  
59  
60

## 1 *Secondary outcome*

2 The secondary outcomes will be 1) the proportion of participants who increase  
3 their number of daily steps by 1,000 or more in 3-6 weeks or 6-9 weeks from  
4 the baseline level (average); 2) incident falls in 3-6 weeks or 6-9 weeks; and  
5 3) incident pain in 3-6 weeks or 6-9 weeks (**Table 2**).

## 7 *Power and sample size*

8 The sample size was estimated using the average increase in the number of  
9 daily steps in a previous study conducted in 2013<sup>7</sup>. The average difference in  
10 the number of daily steps between the intervention group and the control  
11 group was 1,302 (an increase of 2,348 steps in the intervention group vs. an  
12 increase of 1,046 steps in the control group) when the intervention group was  
13 given an incentive of \$20 (approximately ¥2,000 at the time of the study in  
14 2013). In this previous study, the standard deviation in the control group was  
15 1,711 steps.

16 Therefore, we assumed that same result (an average difference of 1,302  
17 steps) would be achieved by offering a financial incentive of ¥2,000, and  
18 setting the standard deviation at 1,711. When an  $\alpha$  error of 0.05 and a  
19 statistical power of 0.90 was applied, the minimum sample size was 74  
20 persons (37 persons per group). Therefore, a total number of 74 participants  
21 (37 participants in each group) was set as the target sample size for analysis.

1  
2  
3  
4 1 ***Statistical analyses***  
5

6 2 To compare the primary outcome (average difference) between the  
7  
8 3 intervention group and the waitlist control group, t-test or a linear mixed  
9  
10  
11 4 model will be applied.  
12

13  
14 5 For comparison of secondary outcomes between the intervention group  
15  
16 6 and the waitlist control group, chi-squared test or a logistic regression model  
17  
18  
19 7 will be applied.  
20

21 8 In addition, stratified analyses will be conducted to check for any  
22  
23  
24 9 differences in the number of steps in terms of sex, age, frailty, physical  
25  
26  
27 10 activity level, transportation when going out, education level, work,  
28  
29 11 subjective economic status, time affluence (having spare time), pain, and  
30  
31  
32 12 obesity.  
33

34 13 To apply the intention-to-treat principle, multiple imputations will be  
35  
36  
37 14 conducted to consider the effects of missing values on outcome variables.  
38

39 15 All of the above analyses will be performed using SAS version 9.4 (SAS  
40  
41  
42 16 Institute Inc. North Carolina, USA).  
43  
44  
45  
46  
47  
48  
49  
50  
51  
52  
53  
54  
55  
56  
57  
58  
59  
60

## 1 **ETHICS AND DISSEMINATION**

### 2 *Ethical considerations*

3 The ethics committee of Tohoku University Graduate School of Medicine  
4 (Sendai, Japan) has reviewed and approved the study protocol (No.  
5 2018-1-171).

6 The investigator will explain the research proposal along with the  
7 documents, and provide enough time for individuals to consider their  
8 participation. Handwritten signatures will be required on the consent  
9 document. The consent form will guarantee protection of personal information,  
10 and use of the dataset only for academic purposes. Consent documents will be  
11 kept by the principal investigator, and copies will be given to the participants.

12 All data on participants will be managed by use of an ID number.  
13 Personal information will be strictly managed at Tohoku University Graduate  
14 School of Medicine. Personal information will be deleted from the dataset for  
15 statistical analysis. After the research period, participant's information data  
16 will be disposed of in a prescribed way.

17 Because this trial is a noninvasive intervention, no Data Monitoring  
18 Committee will be organized.

19 If the research protocol needs to change, the principal investigator  
20 must obtain approval from the chief of the research institution through the  
21 ethical review committee.

1  
2  
3  
4  
5  
6  
7  
8  
9  
10  
11  
12  
13  
14  
15  
16  
17  
18  
19  
20  
21  
22  
23  
24  
25  
26  
27  
28  
29  
30  
31  
32  
33  
34  
35  
36  
37  
38  
39  
40  
41  
42  
43  
44  
45  
46  
47  
48  
49  
50  
51  
52  
53  
54  
55  
56  
57  
58  
59  
60

1 ***Dissemination of research findings***

2 Results and findings will be submitted and published in a peer-reviewed  
3 scientific journal according to the guidelines of CONSORT for RCTs.

4 Conflicts of interest among researchers is managing by the Conflict of Interest  
5 Management Committee at Tohoku University.

6

For peer review only

1  
2  
3  
4  
5  
6  
7  
8  
9  
10  
11  
12  
13  
14  
15  
16  
17  
18  
19  
20  
21  
22  
23  
24  
25  
26  
27  
28  
29  
30  
31  
32  
33  
34  
35  
36  
37  
38  
39  
40  
41  
42  
43  
44  
45  
46  
47  
48  
49  
50  
51  
52  
53  
54  
55  
56  
57  
58  
59  
60

## 1 DISCUSSION

2 This protocol outlines the objectives of the study and explains the study  
3 design.

4 If this study is conducted in accordance with the present plan, the  
5 present study would be first RCT for examining the effect of financial  
6 incentives for increasing the number of daily steps in Asian population.

7 This study has several limitations. First, the intervention involves only  
8 one type of financial incentive. Thus, the effect of a change in the  
9 corresponding financial incentive or its application (e.g. donation) would be  
10 unclear. Second, only short-term effects during 9 weeks will be evaluated.  
11 Thus, the long-term effect (maintaining a higher number of daily walking  
12 steps) of the financial incentive would be unclear.

13

1  
2  
3  
4 1 **Authors' contributions:** Ichiro Tsuji supervised this study and is the  
5  
6 2 guarantor. Yasutake Tomata, Fumiya Tanji and Ichiro Tsuji have made were  
7  
8 3 involved in the design. Yasutake Tomata, Dieta Nurrika, Yingxu Liu and Shu  
9  
10 4 Zhang prepared draft manuscript. Saho Abe, Kouichi Matsumoto, Shu Zhang,  
11  
12 5 Yumika Kotaki, Sanae Matsuyama, Yukai Lu, Yumi Sugawara, Shino Bando,  
13  
14 6 Teiichiro Yamazaki, Tatsui Otsuka, and Toshimasa Sone revised the  
15  
16 7 manuscript. Yasutake Tomata carried out the statistical calculation. All  
17  
18 8 authors approved submission of this manuscript.

19  
20  
21  
22  
23  
24 9 **Competing interests:** The authors have no financial disclosures in association  
25  
26 10 with this study.

27  
28  
29 11 **Ethical approval:** The study protocol was reviewed and approved by the  
30  
31 12 Ethics Committee of Tohoku University Graduate School of Medicine.

32  
33  
34 13 **Provenance and peer review:** Not commissioned; externally peer reviewed.

35  
36  
37 14 **Funding:** This work was supported by TERUMO Foundation for Life Sciences  
38  
39 15 and Arts.

40  
41  
42 16 **Copyright:** The Corresponding Author has the right to grant on behalf of all  
43  
44 17 authors and does grant on behalf of all authors, an exclusive licence ( or non  
45  
46 18 exclusive for government employees) on a worldwide basis to the BMJ  
47  
48 19 Publishing Group Ltd and its Licensees to permit this article (if  
49  
50 20 accepted) to be published in BMJ OPEN editions and any other BMJ PGL  
51  
52 21 products to exploit all subsidiary rights, as set out in our licence ( <http://>  
53  
54  
55  
56  
57  
58  
59  
60

1  
2  
3  
4 1 group.bmj.com/ products/ journals/instructions-for-authors/licence-forms/)  
5  
6  
7  
8  
9  
10  
11  
12  
13  
14  
15  
16  
17  
18  
19  
20  
21  
22  
23  
24  
25  
26  
27  
28  
29  
30  
31  
32  
33  
34  
35  
36  
37  
38  
39  
40  
41  
42  
43  
44  
45  
46  
47  
48  
49  
50  
51  
52  
53  
54  
55  
56  
57  
58  
59  
60



**References**

1. 2018 Physical Activity Guidelines Advisory Committee. 2018 Physical Activity Guidelines Advisory Committee Scientific Report. Washington, DC: U.S. Department of Health and Human Services 2018.
2. World Health Organization. Global action plan on physical activity 2018–2030: more active people for a healthier world 2018 [Available from: <http://www.who.int/iris/handle/10665/272722>].
3. Miyachi M, Tripette J, Kawakami R, et al. "+10 min of Physical Activity per Day": Japan Is Looking for Efficient but Feasible Recommendations for Its Population. *J Nutr Sci Vitaminol (Tokyo)* 2015;61 Suppl:S7-9. doi: 10.3177/jnsv.61.S7 [published Online First: 2015/11/26]
4. Nishi N. Monitoring Obesity Trends in Health Japan 21. *J Nutr Sci Vitaminol (Tokyo)* 2015;61 Suppl:S17-9. doi: 10.3177/jnsv.61.S17 [published Online First: 2015/11/26]
5. The Ministry of Health LaWiJ. Guideline of financial incentives for health promotion 2016
6. Giles EL, Robalino S, McColl E, et al. The effectiveness of financial incentives for health behaviour change: systematic review and meta-analysis. *PLoS One* 2014;9(3):e90347. doi: 10.1371/journal.pone.0090347 [published Online First: 2014/03/13]

(Study protocol ver. 1)  
page. 24

- 1 7. Harkins KA, Kullgren JT, Bellamy SL, et al. A Trial of Financial and  
2 Social Incentives to Increase Older Adults' Walking. *Am J Prev Med*  
3 2017;52(5):e123-e30. doi: 10.1016/j.amepre.2016.11.011 [published  
4 Online First: 2017/01/08]
- 5 8. Patel MS, Asch DA, Rosin R, et al. Individual Versus Team-Based  
6 Financial Incentives to Increase Physical Activity: A Randomized,  
7 Controlled Trial. *J Gen Intern Med* 2016;31(7):746-54. doi:  
8 10.1007/s11606-016-3627-0 [published Online First: 2016/03/16]
- 9 9. Arai H, Satake S. English translation of the Kihon Checklist. *Geriatr*  
10 *Gerontol Int* 2015;15(4):518-9. doi: 10.1111/ggi.12397
- 11 10. Satake S, Senda K, Hong YJ, et al. Validity of the Kihon Checklist for  
12 assessing frailty status. *Geriatr Gerontol Int* 2015 doi:  
13 10.1111/ggi.12543 [published Online First: 2015/07/15]
- 14 11. Sewo Sampaio PY, Sampaio RA, Yamada M, et al. Validation and  
15 translation of the Kihon Checklist (frailty index) into Brazilian  
16 Portuguese. *Geriatr Gerontol Int* 2014;14(3):561-9. doi:  
17 10.1111/ggi.12134
- 18 12. Fukutomi E, Okumiya K, Wada T, et al. Relationships between each  
19 category of 25-item frailty risk assessment (Kihon Checklist) and newly  
20 certified older adults under Long-Term Care Insurance: A 24-month  
21 follow-up study in a rural community in Japan. *Geriatr Gerontol Int*

- 1  
2  
3  
4 1 2015;15(7):864-71. doi: 10.1111/ggi.12360  
5  
6 2 13. Tomata Y, Hozawa A, Ohmori-Matsuda K, et al. [Validation of the  
7  
8 3 Kihon Checklist for predicting the risk of 1-year incident long-term  
9  
10 4 care insurance certification: the Ohsaki Cohort 2006 Study]. *Nihon*  
11  
12 *Koshu Eisei Zasshi* 2011;58(1):3-13.  
13  
14 5  
15  
16 6 14. Fujii H, Yamamoto S, Takeda-Imai F, et al. Validity and applicability of  
17  
18 7 a simple questionnaire for the estimation of total and domain-specific  
19  
20 8 physical activity. *Diabetology International* 2011;2(2):47-54. doi:  
21  
22 9 10.1007/s13340-011-0025-z  
23  
24  
25  
26 10 15. Sasai H, Nakata Y, Murakami H, et al. Simultaneous Validation of  
27  
28 11 Seven Physical Activity Questionnaires Used in Japanese Cohorts for  
29  
30 12 Estimating Energy Expenditure: A Doubly Labeled Water Study. *J*  
31  
32 *Epidemiol* 2018 doi: 10.2188/jea.JE20170129 [published Online First:  
33  
34 13 2018/05/02]  
35  
36  
37 14  
38  
39 15 16. Ministry of Internal Affairs and Communications. Population Census  
40  
41 1996 [Available from:  
42  
43 <http://www.stat.go.jp/english/data/kokusei/index.html>.  
44  
45 17  
46  
47 18 17. Tomata Y, Tanno K, Zhang S, et al. Subjective Household Economic  
48  
49 19 Status and Obesity in Toddlers: A Cross-Sectional Study of Daycare  
50  
51 20 Centers in Japan. *J Epidemiol* 2018 doi: 10.2188/jea.JE20170081  
52  
53 21 [published Online First: 2018/06/12]  
54  
55  
56  
57  
58  
59  
60

(Study protocol ver. 1)  
page. 26

- 1  
2  
3  
4 18. Kaiho Y, Sugawara Y, Sugiyama K, et al. Impact of Pain on Incident  
5  
6 2 Risk of Disability in Elderly Japanese: Cause-specific Analysis.  
7  
8 3 *Anesthesiology* 2017;126(4):688-96. doi:  
9  
10  
11 4 10.1097/aln.0000000000001540 [published Online First: 2017/02/10]  
12  
13  
14  
15  
16  
17  
18  
19  
20  
21  
22  
23  
24  
25  
26  
27  
28  
29  
30  
31  
32  
33  
34  
35  
36  
37  
38  
39  
40  
41  
42  
43  
44  
45  
46  
47  
48  
49  
50  
51  
52  
53  
54  
55  
56  
57  
58  
59  
60

1  
2  
3  
4  
5  
6  
7  
8  
9  
10  
11  
12  
13  
14  
15  
16  
17  
18  
19  
20  
21  
22  
23  
24  
25  
26  
27  
28  
29  
30  
31  
32  
33  
34  
35  
36  
37  
38  
39  
40  
41  
42  
43  
44  
45  
46  
47  
48  
49  
50  
51  
52  
53  
54  
55  
56  
57  
58  
59  
60

1 **Figure 1:** Flow chart of the study procedure.

For peer review only

(Study protocol ver. 1)  
page. 28

1 **Table 1:** Time line for the evaluation.

| Time line  | Purpose of evaluation                    | Hypothesis                                                    |
|------------|------------------------------------------|---------------------------------------------------------------|
| 0-3 weeks  | Baseline number of steps                 |                                                               |
| 3-6 weeks  | Effect of incentive                      | Number of steps in the intervention group will be higher?     |
| 6-9 weeks  | Sustained effect of incentive            | Number of steps in the intervention group will remain higher? |
| 9-12 weeks | Chance for waitlist control <sup>a</sup> |                                                               |

a. Period for providing a chance of financial incentive for the waitlist control group. Thus, this period will not be included in the statistical analysis of this trial.

1 **Table 2:** Study outcomes.

| Measurement                                           | Definition                                                                                                  |
|-------------------------------------------------------|-------------------------------------------------------------------------------------------------------------|
| <b>Primary outcome</b>                                |                                                                                                             |
| – Increase in number of steps                         | Mean increase in the average number of steps (in 3-6 weeks or 6-9 weeks) compared with the baseline number. |
| <b>Secondary outcome</b>                              |                                                                                                             |
| – Proportion of participants who increase their steps | Proportion of participants who increase their average number of steps by 1,000 from the baseline.           |
| – Incident falls                                      | Incident rate of falls in 3-6 weeks or 6-9 weeks.                                                           |
| – Incident pain                                       | Incident rate of pain in 3-6 weeks or 6-9 weeks.                                                            |

2

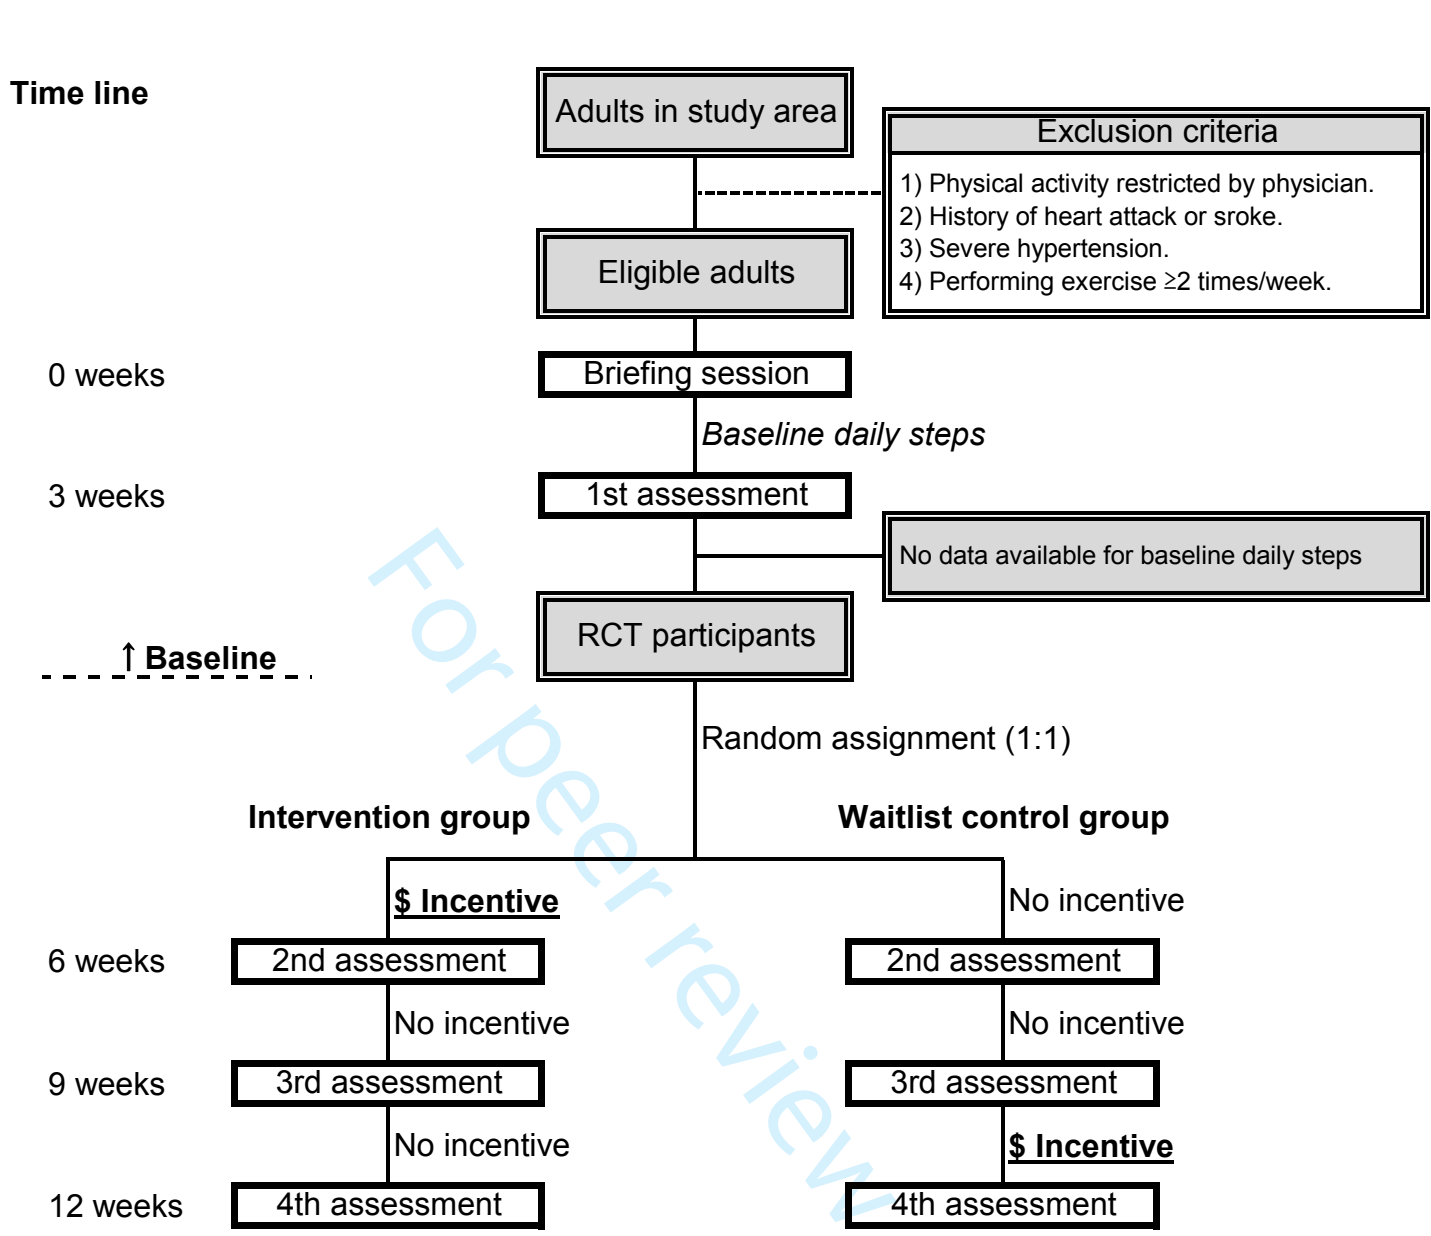



1 SPIRIT 2013 Checklist: Recommended items to address in a clinical trial protocol and related documents

2 [Randomized controlled trial of a financial incentive for increasing the number of daily walking steps: Study protocol](#)

| Section/item                                              | Item No | Description                                                                                                                                                                                                                                                                                                                                                                    | Page, line       |
|-----------------------------------------------------------|---------|--------------------------------------------------------------------------------------------------------------------------------------------------------------------------------------------------------------------------------------------------------------------------------------------------------------------------------------------------------------------------------|------------------|
| <b>Administrative information</b>                         |         |                                                                                                                                                                                                                                                                                                                                                                                |                  |
| Title                                                     | 1       | Descriptive title identifying the study design, population, interventions, and, if applicable, trial acronym                                                                                                                                                                                                                                                                   | Page 1, line 2   |
| Trial registration                                        | 2a      | Trial identifier and registry name. If not yet registered, name of intended registry                                                                                                                                                                                                                                                                                           | Page 4, line 2   |
|                                                           | 2b      | All items from the World Health Organization Trial Registration Data Set                                                                                                                                                                                                                                                                                                       | N/A              |
| Protocol version                                          | 3       | Date and version identifier                                                                                                                                                                                                                                                                                                                                                    | Page 1           |
| Funding                                                   | 4       | Sources and types of financial, material, and other support                                                                                                                                                                                                                                                                                                                    | Page 21, line 14 |
| Roles and responsibilities                                | 5a      | Names, affiliations, and roles of protocol contributors                                                                                                                                                                                                                                                                                                                        | Page 21, line 1  |
|                                                           | 5b      | Name and contact information for the trial sponsor                                                                                                                                                                                                                                                                                                                             | Page 21, line 14 |
|                                                           | 5c      | Role of study sponsor and funders, if any, in study design; collection, management, analysis, and interpretation of data; writing of the report; and the decision to submit the report for publication, including whether they will have ultimate authority over any of these activities                                                                                       |                  |
|                                                           | 5d      | Composition, roles, and responsibilities of the coordinating centre, steering committee, endpoint adjudication committee, data management team, and other individuals or groups overseeing the trial, if applicable (see Item 21a for data monitoring committee)                                                                                                               | N/A              |
| <b>Introduction</b>                                       |         |                                                                                                                                                                                                                                                                                                                                                                                |                  |
| Background and rationale                                  | 6a      | Description of research question and justification for undertaking the trial, including summary of relevant studies (published and unpublished) examining benefits and harms for each intervention                                                                                                                                                                             | Page 6, line 7   |
|                                                           | 6b      | Explanation for choice of comparators                                                                                                                                                                                                                                                                                                                                          | Page 6, line 19  |
| Objectives                                                | 7       | Specific objectives or hypotheses                                                                                                                                                                                                                                                                                                                                              | Page 7, line 2   |
| Trial design                                              | 8       | Description of trial design including type of trial (eg, parallel group, crossover, factorial, single group), allocation ratio, and framework (eg, superiority, equivalence, noninferiority, exploratory)                                                                                                                                                                      | Page 8, line 3   |
| <b>Methods: Participants, interventions, and outcomes</b> |         |                                                                                                                                                                                                                                                                                                                                                                                |                  |
| Study setting                                             | 9       | Description of study settings (eg, community clinic, academic hospital) and list of countries where data will be collected. Reference to where list of study sites can be obtained                                                                                                                                                                                             | Page 8, line 10  |
| Eligibility criteria                                      | 10      | Inclusion and exclusion criteria for participants. If applicable, eligibility criteria for study centres and individuals who will perform the interventions (eg, surgeons, psychotherapists)                                                                                                                                                                                   | Page 8, line 17  |
| Interventions                                             | 11a     | Interventions for each group with sufficient detail to allow replication, including how and when they will be administered                                                                                                                                                                                                                                                     | Page 9, line 14  |
|                                                           | 11b     | Criteria for discontinuing or modifying allocated interventions for a given trial participant (eg, drug dose change in response to harms, participant request, or improving/worsening disease)                                                                                                                                                                                 | N/A              |
|                                                           | 11c     | Strategies to improve adherence to intervention protocols, and any procedures for monitoring adherence (eg, drug tablet return, laboratory tests)                                                                                                                                                                                                                              | N/A              |
|                                                           | 11d     | Relevant concomitant care and interventions that are permitted or prohibited during the trial                                                                                                                                                                                                                                                                                  | N/A              |
| Outcomes                                                  | 12      | Primary, secondary, and other outcomes, including the specific measurement variable (eg, systolic blood pressure), analysis metric (eg, change from baseline, final value, time to event), method of aggregation (eg, median, proportion), and time point for each outcome. Explanation of the clinical relevance of chosen efficacy and harm outcomes is strongly recommended | Page 15, line 19 |
| Participant timeline                                      | 13      | Time schedule of enrolment, interventions (including any run-ins and washouts), assessments, and visits for participants. A schematic diagram is highly recommended (see Figure)                                                                                                                                                                                               | Page 9, line 14  |
| Sample size                                               | 14      | Estimated number of participants needed to achieve study objectives and how it was determined, including clinical and statistical assumptions supporting any sample size calculations                                                                                                                                                                                          | Page 16, line 8  |
| Recruitment                                               | 15      | Strategies for achieving adequate participant enrolment to reach target sample size                                                                                                                                                                                                                                                                                            | Page 8, line 8   |

**Methods: Assignment of interventions (for controlled trials)****Allocation:**

|                                  |     |                                                                                                                                                                                                                                                                                                                                                          |                  |
|----------------------------------|-----|----------------------------------------------------------------------------------------------------------------------------------------------------------------------------------------------------------------------------------------------------------------------------------------------------------------------------------------------------------|------------------|
| Sequence generation              | 16a | Method of generating the allocation sequence (eg, computer-generated random numbers), and list of any factors for stratification. To reduce predictability of a random sequence, details of any planned restriction (eg, blocking) should be provided in a separate document that is unavailable to those who enrol participants or assign interventions | Page 11, line 18 |
| Allocation concealment mechanism | 16b | Mechanism of implementing the allocation sequence (eg, central telephone; sequentially numbered, opaque, sealed envelopes), describing any steps to conceal the sequence until interventions are assigned                                                                                                                                                | Page 11, line 18 |
| Implementation                   | 16c | Who will generate the allocation sequence, who will enrol participants, and who will assign participants to interventions                                                                                                                                                                                                                                | Page 11, line 20 |
| Blinding (masking)               | 17a | Who will be blinded after assignment to interventions (eg, trial participants, care providers, outcome assessors, data analysts), and how                                                                                                                                                                                                                | Page 12, line 2  |
|                                  | 17b | If blinded, circumstances under which unblinding is permissible, and procedure for revealing a participant's allocated intervention during the trial                                                                                                                                                                                                     | N/A              |

**Methods: Data collection, management, and analysis**

|                         |     |                                                                                                                                                                                                                                                                                                                                                                                                              |                  |
|-------------------------|-----|--------------------------------------------------------------------------------------------------------------------------------------------------------------------------------------------------------------------------------------------------------------------------------------------------------------------------------------------------------------------------------------------------------------|------------------|
| Data collection methods | 18a | Plans for assessment and collection of outcome, baseline, and other trial data, including any related processes to promote data quality (eg, duplicate measurements, training of assessors) and a description of study instruments (eg, questionnaires, laboratory tests) along with their reliability and validity, if known. Reference to where data collection forms can be found, if not in the protocol | Page 12, line 10 |
|                         | 18b | Plans to promote participant retention and complete follow-up, including list of any outcome data to be collected for participants who discontinue or deviate from intervention protocols                                                                                                                                                                                                                    | N/A              |
| Data management         | 19  | Plans for data entry, coding, security, and storage, including any related processes to promote data quality (eg, double data entry; range checks for data values). Reference to where details of data management procedures can be found, if not in the protocol                                                                                                                                            | Page 12, line 2  |
| Statistical methods     | 20a | Statistical methods for analysing primary and secondary outcomes. Reference to where other details of the statistical analysis plan can be found, if not in the protocol                                                                                                                                                                                                                                     | Page 17, line 2  |
|                         | 20b | Methods for any additional analyses (eg, subgroup and adjusted analyses)                                                                                                                                                                                                                                                                                                                                     | Page 17, line 8  |
|                         | 20c | Definition of analysis population relating to protocol non-adherence (eg, as randomised analysis), and any statistical methods to handle missing data (eg, multiple imputation)                                                                                                                                                                                                                              | Page 17, line 13 |

**Methods: Monitoring**

|                 |     |                                                                                                                                                                                                                                                                              |                  |
|-----------------|-----|------------------------------------------------------------------------------------------------------------------------------------------------------------------------------------------------------------------------------------------------------------------------------|------------------|
| Data monitoring | 21a | Composition of data monitoring committee (DMC); summary of its role and reporting structure; statement of whether it is independent from the sponsor and competing interests; and reference to where further details about its charter can be found, if not in the protocol. | Page 18, line 17 |
|                 |     | Alternatively, an explanation of why a DMC is not needed                                                                                                                                                                                                                     | Page 18, line 17 |
|                 | 21b | Description of any interim analyses and stopping guidelines, including who will have access to these interim results and make the final decision to terminate the trial                                                                                                      | N/A              |
| Harms           | 22  | Plans for collecting, assessing, reporting, and managing solicited and spontaneously reported adverse events and other unintended effects of trial interventions or trial conduct                                                                                            | Page 18, line 17 |
| Auditing        | 23  | Frequency and procedures for auditing trial conduct, if any, and whether the process will be independent from investigators and the sponsor                                                                                                                                  | N/A              |

| <b>Ethics and dissemination</b> |     |                                                                                                                                                                                                                                                                                     |                  |
|---------------------------------|-----|-------------------------------------------------------------------------------------------------------------------------------------------------------------------------------------------------------------------------------------------------------------------------------------|------------------|
| Research ethics approval        | 24  | Plans for seeking research ethics committee/institutional review board (REC/IRB) approval                                                                                                                                                                                           | Page 18, line 3  |
| Protocol amendments             | 25  | Plans for communicating important protocol modifications (eg, changes to eligibility criteria, outcomes, analyses) to relevant parties (eg, investigators, REC/IRBs, trial participants, trial registries, journals, regulators)                                                    | Page 18, line 19 |
| Consent or assent               | 26a | Who will obtain informed consent or assent from potential trial participants or authorised surrogates, and how (see Item 32)                                                                                                                                                        | Page 18, line 6  |
|                                 | 26b | Additional consent provisions for collection and use of participant data and biological specimens in ancillary studies, if applicable                                                                                                                                               | N/A              |
| Confidentiality                 | 27  | How personal information about potential and enrolled participants will be collected, shared, and maintained in order to protect confidentiality before, during, and after the trial                                                                                                | Page 18, line 12 |
| Declaration of interests        | 28  | Financial and other competing interests for principal investigators for the overall trial and each study site                                                                                                                                                                       | Page 21, line 9  |
| Access to data                  | 29  | Statement of who will have access to the final trial dataset, and disclosure of contractual agreements that limit such access for investigators                                                                                                                                     | Page 12, line 2  |
| Ancillary and post-trial care   | 30  | Provisions, if any, for ancillary and post-trial care, and for compensation to those who suffer harm from trial participation                                                                                                                                                       | N/A              |
| Dissemination policy            | 31a | Plans for investigators and sponsor to communicate trial results to participants, healthcare professionals, the public, and other relevant groups (eg, via publication, reporting in results databases, or other data sharing arrangements), including any publication restrictions | Page 19, line 2  |
|                                 | 31b | Authorship eligibility guidelines and any intended use of professional writers                                                                                                                                                                                                      | Page 21, line 1  |
|                                 | 31c | Plans, if any, for granting public access to the full protocol, participant-level dataset, and statistical code                                                                                                                                                                     | N/A              |

#### **Appendices**

|                            |    |                                                                                                                                                                                                |     |
|----------------------------|----|------------------------------------------------------------------------------------------------------------------------------------------------------------------------------------------------|-----|
| Informed consent materials | 32 | Model consent form and other related documentation given to participants and authorised surrogates                                                                                             | N/A |
| Biological specimens       | 33 | Plans for collection, laboratory evaluation, and storage of biological specimens for genetic or molecular analysis in the current trial and for future use in ancillary studies, if applicable | N/A |

\*It is strongly recommended that this checklist be read in conjunction with the SPIRIT 2013 Explanation & Elaboration for important clarification on the items. Amendments to the protocol should be tracked and dated. The SPIRIT checklist is copyrighted by the SPIRIT Group under the Creative Commons "Attribution-NonCommercial-NoDerivs 3.0 Unported" license.

# BMJ Open

## Randomized controlled trial of a financial incentive for increasing the number of daily walking steps: Study protocol

|                                 |                                                                                                                                                                                                                                                                                                                                                                                                                                                                                                                                                                                                                                                                                                                                                                                                                                                                                                                                                                                                                                                                                                                                                                                                                                                                                                                                                                                                                                                                                                                                                                                                                                                                                                                                                                                                                                                                                                                                                                                                                                                                                                                                                                         |
|---------------------------------|-------------------------------------------------------------------------------------------------------------------------------------------------------------------------------------------------------------------------------------------------------------------------------------------------------------------------------------------------------------------------------------------------------------------------------------------------------------------------------------------------------------------------------------------------------------------------------------------------------------------------------------------------------------------------------------------------------------------------------------------------------------------------------------------------------------------------------------------------------------------------------------------------------------------------------------------------------------------------------------------------------------------------------------------------------------------------------------------------------------------------------------------------------------------------------------------------------------------------------------------------------------------------------------------------------------------------------------------------------------------------------------------------------------------------------------------------------------------------------------------------------------------------------------------------------------------------------------------------------------------------------------------------------------------------------------------------------------------------------------------------------------------------------------------------------------------------------------------------------------------------------------------------------------------------------------------------------------------------------------------------------------------------------------------------------------------------------------------------------------------------------------------------------------------------|
| Journal:                        | <i>BMJ Open</i>                                                                                                                                                                                                                                                                                                                                                                                                                                                                                                                                                                                                                                                                                                                                                                                                                                                                                                                                                                                                                                                                                                                                                                                                                                                                                                                                                                                                                                                                                                                                                                                                                                                                                                                                                                                                                                                                                                                                                                                                                                                                                                                                                         |
| Manuscript ID                   | bmjopen-2018-026086.R1                                                                                                                                                                                                                                                                                                                                                                                                                                                                                                                                                                                                                                                                                                                                                                                                                                                                                                                                                                                                                                                                                                                                                                                                                                                                                                                                                                                                                                                                                                                                                                                                                                                                                                                                                                                                                                                                                                                                                                                                                                                                                                                                                  |
| Article Type:                   | Protocol                                                                                                                                                                                                                                                                                                                                                                                                                                                                                                                                                                                                                                                                                                                                                                                                                                                                                                                                                                                                                                                                                                                                                                                                                                                                                                                                                                                                                                                                                                                                                                                                                                                                                                                                                                                                                                                                                                                                                                                                                                                                                                                                                                |
| Date Submitted by the Author:   | 06-Mar-2019                                                                                                                                                                                                                                                                                                                                                                                                                                                                                                                                                                                                                                                                                                                                                                                                                                                                                                                                                                                                                                                                                                                                                                                                                                                                                                                                                                                                                                                                                                                                                                                                                                                                                                                                                                                                                                                                                                                                                                                                                                                                                                                                                             |
| Complete List of Authors:       | Tomata, Yasutake; Tohoku University School of Medicine, Division of Epidemiology, Department of Health Informatics and Public Health Tanji, Fumiya; Tohoku University School of Medicine, Division of Epidemiology, Department of Health Informatics and Public Health Nurrika, Dieta; Tohoku University School of Medicine, Division of Epidemiology, Department of Health Informatics and Public Health Liu, Yingxu; Tohoku University School of Medicine, Division of Epidemiology, Department of Health Informatics and Public Health Abe, Saho; Tohoku University School of Medicine, Division of Epidemiology, Department of Health Informatics and Public Health Matsumoto, Koichi; Tohoku University School of Medicine, Division of Epidemiology, Department of Health Informatics and Public Health Zhang, Shu; Tohoku University School of Medicine, Division of Epidemiology, Department of Health Informatics and Public Health Kotaki, Yumika; Tohoku University School of Medicine, Division of Epidemiology, Department of Health Informatics and Public Health Matsuyama, Sanae; Tohoku University School of Medicine, Division of Epidemiology, Department of Health Informatics and Public Health Lu, Yukai; Tohoku University School of Medicine, Division of Epidemiology, Department of Health Informatics and Public Health Sugawara, Yumi; Tohoku University School of Medicine, Division of Epidemiology, Department of Health Informatics and Public Health Bando, Shino; Tohoku University School of Medicine, Division of Epidemiology, Department of Health Informatics and Public Health Yamazaki, Teiichiro; Tohoku University School of Medicine, Division of Epidemiology, Department of Health Informatics and Public Health Otsuka, Tatsui; Tohoku University School of Medicine, Division of Epidemiology, Department of Health Informatics and Public Health Sone, Toshimasa; Tohoku University School of Medicine, Division of Epidemiology, Department of Health Informatics and Public Health Tsuji, Ichiro; Tohoku University School of Medicine, Division of Epidemiology, Department of Health Informatics and Public Health |
| <b>Primary Subject Heading</b>: | Epidemiology                                                                                                                                                                                                                                                                                                                                                                                                                                                                                                                                                                                                                                                                                                                                                                                                                                                                                                                                                                                                                                                                                                                                                                                                                                                                                                                                                                                                                                                                                                                                                                                                                                                                                                                                                                                                                                                                                                                                                                                                                                                                                                                                                            |
| Secondary Subject Heading:      | Public health, Sports and exercise medicine                                                                                                                                                                                                                                                                                                                                                                                                                                                                                                                                                                                                                                                                                                                                                                                                                                                                                                                                                                                                                                                                                                                                                                                                                                                                                                                                                                                                                                                                                                                                                                                                                                                                                                                                                                                                                                                                                                                                                                                                                                                                                                                             |
| Keywords:                       | EPIDEMIOLOGY, PUBLIC HEALTH, PREVENTIVE MEDICINE, SPORTS MEDICINE                                                                                                                                                                                                                                                                                                                                                                                                                                                                                                                                                                                                                                                                                                                                                                                                                                                                                                                                                                                                                                                                                                                                                                                                                                                                                                                                                                                                                                                                                                                                                                                                                                                                                                                                                                                                                                                                                                                                                                                                                                                                                                       |

1  
2  
3  
4  
5  
6  
7  
8  
9  
10  
11  
12  
13  
14  
15  
16  
17  
18  
19  
20  
21  
22  
23  
24  
25  
26  
27  
28  
29  
30  
31  
32  
33  
34  
35  
36  
37  
38  
39  
40  
41  
42  
43  
44  
45  
46  
47  
48  
49  
50  
51  
52  
53  
54  
55  
56  
57  
58  
59  
60

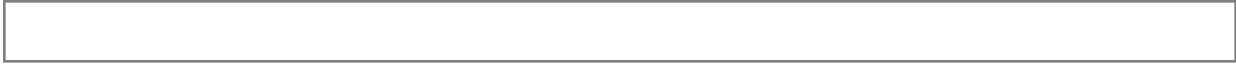

SCHOLARONE™  
Manuscripts

(Study protocol R1)

page. 1

**Title:**

**Randomized controlled trial of a financial incentive for increasing the number of daily walking steps: Study protocol**

**Authors:**

Yasutake Tomata<sup>1</sup>, Fumiya Tanji<sup>1</sup>, Dieta Nurrika<sup>1</sup>, Yingxu Liu<sup>1</sup>, Saho Abe<sup>1</sup>,  
Koichi Matsumoto<sup>1</sup>, Shu Zhang<sup>1</sup>, Yumika Kotaki<sup>1</sup>, Sanae Matsuyama<sup>1</sup>,  
Yukai Lu<sup>1</sup>, Yumi Sugawara<sup>1</sup>, Shino Bando<sup>1</sup>, Teiichiro Yamazaki<sup>1</sup>,  
Tatsui Otsuka<sup>1</sup>, Toshimasa Sone<sup>2</sup>, Ichiro Tsuji<sup>1</sup>

**Author's affiliations:**

1: Division of Epidemiology, Department of Health Informatics and Public Health, Tohoku University School of Public Health, Graduate School of Medicine, Sendai, Japan.

2: Department of Rehabilitation, Faculty of Health Science, Tohoku Fukushi University, Sendai, Japan.

**Corresponding:**

Yasutake Tomata

Division of Epidemiology, Department of Health Informatics and Public Health, Tohoku University School of Public Health, Graduate School of Medicine 2-1, Seiryō-machi, Aoba-ku, Sendai, Miyagi 980-8575, Japan.

Phone: +81-22-717-8123 Fax: +81-22-717-8125.

E-mail: [y-tomata@med.tohoku.ac.jp](mailto:y-tomata@med.tohoku.ac.jp)

1  
2  
3  
4  
5  
6  
7  
8  
9  
10  
11  
12  
13  
14  
15  
16  
17  
18  
19  
20  
21  
22  
23  
24  
25  
26  
27  
28  
29  
30  
31  
32  
33  
34  
35  
36  
37  
38  
39  
40  
41  
42  
43  
44  
45  
46  
47  
48  
49  
50  
51  
52  
53  
54  
55  
56  
57  
58  
59  
60

- 1 **Word count:**
- 2 # Word count for abstract: words: 238
- 3 # Word count for text: words: 2,704
- 4 # Number of references: 18
- 5 # Number of tables: 2
- 6 # Number of figure: 1
- 7 # Number of supplementary tables: 0

For peer review only

## 1 ABSTRACT

2 **Introduction:** Physical activity is one of the major modifiable factors for  
3 promotion of public health. Although it has been reported that financial  
4 incentives would be effective for promoting health behaviors such as  
5 smoking cessation or attendance for cancer screening, few randomized  
6 controlled trials (RCTs) have examined the effect of financial incentives for  
7 increasing the number of daily steps among individuals in a community  
8 setting. The aim of this study is to investigate the effects of financial  
9 incentives for increasing the number of daily steps among  
10 community-dwelling adults in Japan.

11 **Methods and analysis:** This study will be a two-arm, parallel-group RCT. We  
12 will recruit community-dwelling adults who are physically inactive in a  
13 suburban area (Nakayama) of Sendai city, Japan, using leaflets and posters.  
14 Participants that meet the inclusion criteria will be randomly allocated to an  
15 intervention group or a waitlist control group. The intervention group will be  
16 offered a financial incentive (a chance to get shopping points) if participants  
17 increase their daily steps from their baseline. The primary outcome will be  
18 the average increase in the number of daily steps (at 4-6 weeks and 7-9  
19 weeks) relative to the average number of daily steps at the baseline (1-3  
20 weeks). For the sample size calculation, we assumed that an average  
21 difference of 1,302 steps would be achieved.



1  
2  
3  
4 1 **Ethics and dissemination:** This study has been ethically approved by the  
5  
6  
7 2 research ethics committee of Tohoku University Graduate School of  
8  
9  
10 3 Medicine, Japan (No. 2018-1-171). The results will be submitted and  
11  
12 4 published in a peer-reviewed scientific journal.  
13  
14  
15 5 **Registration:** UMIN000033276; Pre-results.  
16  
17  
18  
19  
20  
21  
22  
23  
24  
25  
26  
27  
28  
29  
30  
31  
32  
33  
34  
35  
36  
37  
38  
39  
40  
41  
42  
43  
44  
45  
46  
47  
48  
49  
50  
51  
52  
53  
54  
55  
56  
57  
58  
59  
60

For peer review only

## 1 **Strengths and limitations of this study**

- 2 ➤ This trial will examine the effectiveness of a financial incentive for  
3 increasing the number of daily walking steps.
- 4 ➤ The present study would be first Asian randomized controlled trials of  
5 financial incentives intervention.
- 6 ➤ Limitations include the fact that the intervention will be only one type of  
7 financial incentive.
- 8 ➤ Only short-term effects during 9 weeks will be evaluated.

## 1 INTRODUCTION

2 Physical activity is a major modifiable factor that has benefits in terms of  
3 physical and mental health<sup>1</sup>. Therefore public health strategies to increase  
4 physical activity are implemented worldwide<sup>2</sup>. In the Japanese National  
5 Health Promotion Movement ("Health Japan 21"), a higher number of daily  
6 walking steps is a target for physical activity<sup>3 4</sup>.

7 Recently, to encourage individuals who are not concerned about  
8 health-related behavior to increase the number of steps they walk daily, it  
9 has been suggested that offering them financial incentives might be an  
10 effective approach. The Ministry of Health, Labor and Welfare in Japan has  
11 provided a guideline for promotion of public health using financial  
12 incentives<sup>5</sup>. One such incentive is the introduction of a "health point system"  
13 in which local governments provide "shopping points" that can be redeemed  
14 in local stores when an individual achieves a health-related behavior goal  
15 such as an increase in the number of daily walking steps.

16 A systematic review (meta-analysis) has suggested that financial  
17 incentives would be effective for promotion of health behaviors such as  
18 smoking cessation, or attendance for vaccination or cancer screening<sup>6</sup>.

19 Although a few randomized controlled trials (financial incentives vs. no  
20 intervention) have examined the effect of financial incentives for increasing  
21 the amount of daily steps by individuals in a community setting, the results

(Study protocol R1)

page. 7

1 were not consistent<sup>7 8</sup>; One previous study reported that the target proportion  
2 of steps in the financial intervention group was significantly higher than that  
3 in the control group (relative risk =3.71) during the intervention period<sup>7</sup>,  
4 whereas another study reported that the mean proportion of days on which a  
5 7,000-steps goal was achieved as a result of individual incentive was not  
6 significantly higher than in the control group (0.25 vs 0.18)<sup>8</sup>.

7 The aim of the present study will be to examine the effect of offering  
8 a financial incentive for increasing the number of daily walking steps among  
9 physically inactive adults in a community setting.

## 1       2       3 4       1    **METHODS**

### 5 6       2    *Study design*

7  
8  
9       3    The design is a randomized controlled trial (single-center, single-blind,  
10       4    parallel-group study) in which subjects are randomly assigned to one of two  
11  
12       5    groups: an intervention group or a waitlist control group.  
13  
14  
15  
16

### 17       6 18 19 20       7    *Recruitment*

21  
22  
23       8    In August 2018, two types of leaflets (preliminary notice, and information  
24  
25       9    about recruitment) related to the study will be distributed to each house in  
26  
27       10   the Nakayama area, Aoba-ku, Sendai city, Japan. Posters giving details about  
28  
29       11   recruitment will also be displayed in the Nakayama area. Inclusion criteria  
30  
31       12   and exclusion criteria will be stated on the entry form. Applicants who meet  
32  
33       13   the inclusion criteria and not the exclusion criteria will be able to apply by  
34  
35       14   Web application, FAX, or telephone. Considering an estimated attrition of  
36  
37       15   about 10 individuals, we will accept 85 applicants.  
38  
39  
40  
41  
42  
43  
44

### 45       16 46 47       17   *Inclusion criteria*

48  
49  
50       18   Individuals will be able to apply for participation in this study if they meet  
51  
52       19   all of the following criteria: 1) Men and women (aged 20 years or more)  
53  
54       20   living in the Nakayama area, 2) Possession of an IC Card for Community  
55  
56       21   Development in the Nakayama area (*Nakayama Machi-dukuri IC Card*), 3)  
57  
58  
59  
60

1 Ability to walk unaided without using a cane, Zimmer frame, or wheelchair.

2 All the above inclusion criteria will be judged on the basis of self-reports  
3 from the participants.

4 Possession of the IC Card was considered to be an inclusion criterion  
5 because it was a means of providing the intervention (financial incentive).

6 The IC Card was developed as a financial incentive to promote physical  
7 activity. Persons possessing the IC Card are given shopping points when they  
8 go shopping and participate in community activities in the Nakayama area.

9 The IC Card is also intended to enhance social interaction with locals. The  
10 intervention in the present study is the first community activity project.

11 According to the 2015 Population Census, the number of adults (aged  
12 20 years or more) living in Nakayama area was 13,734 persons.

13

#### 14 ***Exclusion criteria***

15 Individuals who meet any of the following criteria will not be able to  
16 participate in the study: 1) Individuals whose physical activity is restricted  
17 by a physician, 2) History of heart attack or stroke within the last 6 months,  
18 3) Blood pressure exceeding 180 mmHg systolic or 110 mmHg diastolic, 4)  
19 Already habitually exercising (task of  $\geq 4$  metabolic equivalents) more than  
20 twice per week. All exclusion criteria except for blood pressure will be  
21 judged on the basis of self-reports from participants.

1  
2  
3  
4 1 ***Study procedure***

5  
6  
7 2 **Figure 1** illustrates the flow of the study procedure.

8  
9 3 In the briefing session in September 2018, the inclusion and exclusion  
10  
11  
12 4 criteria for each applicant will be rechecked by researchers in the study site  
13  
14  
15 5 (the Nakayama Tobinoko House). Chosen subjects will provide informed  
16  
17  
18 6 consent to participate in the study. On the same day, blood pressure  
19  
20  
21 7 measurement, an interview using a questionnaire, and explanation about use  
22  
23  
24 8 of a pedometer will then be performed. At the briefing session, each  
25  
26  
27 9 participant will be provided with a pedometer.

28  
29 10 The day after the briefing session will be the start date of steps  
30  
31  
32 11 evaluation. We will perform evaluation and feedback about daily steps every  
33  
34  
35 12 3 weeks in the study site (the Nakayama Tobinoko House). All participants  
36  
37  
38 13 must wear the pedometer every day during the study period (12 weeks).

39  
40 14 For all participants, the number of daily steps at the baseline will be  
41  
42  
43 15 measured in first 3 weeks of the study period (**Table 1**). Then, participants  
44  
45  
46 16 who provide their data of daily steps will be randomly assigned to the  
47  
48  
49 17 intervention group or the control group (participants who provide any data  
50  
51  
52 18 [ $\geq 1$  days] at the baseline will be included). At this stage, we assume that  
53  
54  
55 19 approximately 74 persons (i.e. the target sample size) would be included in  
56  
57  
58 20 the random assignment.

59 21 During the next 3 weeks (intervention period), the participants in the  
60

1 intervention group will be given a financial incentive if they achieve their  
2 daily steps goals (for definition of goals, see the next section).

3 On the other hand, the control group will be given a chance to gain a  
4 financial incentive (mentioned above) in the last three weeks (9-12 weeks),  
5 and thereby all participants will have a fair opportunity to gain such an  
6 incentive. The data obtained at 10-12 weeks will not be used for analysis to  
7 evaluate the effect.

### 9 ***Intervention***

10 The intervention is a financial incentive in the form of shopping points,  
11 which can be redeemed at facilities in the study area (14 facilities of  
12 Nakayama area). Two kinds of financial incentive will be offered:

- 13 1. If the average number of daily steps in the intervention period is  $\geq 6,000$ ,  
14 shopping points worth 1,000 Japanese yen will be awarded.
- 15 2. If the average number of daily steps during the intervention period  
16 increases by  $\geq 1,000$  from the baseline level, shopping points worth 1,000  
17 Japanese yen will be awarded.

18 These daily step targets have already been applied in Japanese national  
19 health actions<sup>3 4</sup>. National Health Action of Japan has emphasized that an  
20 increase of 1,000 steps has some impact on population health, because it  
21 contributes to a 3.2% reduction in the average relative risk of



1  
2  
3  
4 1 non-communicable diseases, dementia, joint-musculoskeletal impairment,  
5  
6  
7 2 and mortality<sup>3</sup>. For example, if a person keeps walking 6,500 steps during  
8  
9  
10 3 both the baseline and intervention periods, only financial incentive “1”  
11  
12 4 (1,000 Japanese yen worth of points) will be awarded. If a person walks  
13  
14  
15 5 3,000 steps in the baseline period and 4,000 steps in the intervention period,  
16  
17  
18 6 only financial incentive “2” (1,000 Japanese yen worth of points) will be  
19  
20  
21 7 awarded. If a person walks 5,000 steps in the baseline period and 7,000 steps  
22  
23  
24 8 in the intervention period, both financial incentives “1” and “2” (2,000  
25  
26  
27 9 Japanese yen worth of points) will be awarded. Based on the exchange rate  
28  
29 10 on 31st August 2018, 2,000 Japanese yen was equivalent to 14.0 British  
30  
31 11 Pounds.

32  
33  
34 12 All participants will be provided shopping points at the same time  
35  
36  
37 13 (after the end of the trial, i.e. the 12th week) regardless of the intervention  
38  
39  
40 14 period.

#### 41 42 15 43 44 45 16 ***Waitlist control group***

46  
47  
48 17 The waitlist control group is also given a financial incentive in the last three  
49  
50  
51 18 weeks (**Figure 1**). All conditions except for timing will be the same as for  
52  
53  
54 19 the intervention group.

#### 55 56 20 57 58 59 21 ***Power and sample size***

60

1  
2  
3  
4 1 The sample size was estimated by reference to the average increase in the  
5  
6  
7 2 number of daily steps in a previous study conducted in 2013<sup>7</sup>. The average  
8  
9  
10 3 difference in the number of daily steps between the intervention group  
11  
12 4 (n=24) and the control group (n=16) was 1,302 (an increase of 2,348 steps in  
13  
14  
15 5 the intervention group vs. an increase of 1,046 steps in the control group)  
16  
17  
18 6 when the intervention group was given an incentive of \$20 (approximately  
19  
20 7 ¥2,000 at the time of the study in 2013). In this previous study, the standard  
21  
22  
23 8 deviation in the control group of the increase was 1,711 steps.

24  
25  
26 9 Therefore, we assumed the result that an average difference of 1,302  
27  
28  
29 10 steps would be achieved by offering a financial incentive of ¥2,000, and  
30  
31  
32 11 setting the standard deviation at 1,711. When an  $\alpha$  error of 0.05 and a  
33  
34 12 statistical power of 0.90 was applied, the minimum sample size was 74  
35  
36  
37 13 persons (37 persons per group). Therefore, a total number of 74 participants  
38  
39  
40 14 (37 participants in each group) was set as the target sample size for analysis.

#### 41 42 43 44 45 16 ***Randomization***

46  
47  
48 17 After confirming their eligibility, enrolled participants will be assigned to  
49  
50  
51 18 one of the two groups (1:1 allocation) based on the permuted block method  
52  
53  
54 19 by computer-generated randomization. The allocation sequence will be  
55  
56 20 managed by two exclusive researchers of the random assignment.  
57  
58  
59  
60

## 1 **Blinding**

2 A blinded endpoint evaluation design will be applied. Only researchers of the  
3 random assignment can access the assignment data, and other staffs were  
4 blinded to the random assignment. The assignment information was managed  
5 in password-locked dedicated storage media. Notification of the assignment  
6 by the exclusive researchers of the random assignment will be conducted in a  
7 closed room where is separated from the other examination places. In this  
8 notification process, the exclusive researchers of the random assignment will  
9 warn all participants not to talk about their assignment.

10 In addition, statistical analyses will be blinded to the assignment. The  
11 exclusive researchers of the random assignment will not be involved with the  
12 statistical analysis.

13

## 14 **Baseline characteristics**

15 Baseline characteristics will be assessed on the date of the briefing session.

16 Trained interviewers will conduct an interview to obtain information  
17 about medical history, frailty (the Kihon checklist), physical activity,  
18 transportation when going out, education level, work, subjective economic  
19 status, time affluence (having spare time), pain, and falling. We will also  
20 measure the blood pressure of each participant.

21 History of diseases will include stroke, hypertension, myocardial

1 infarction, renal disease, hepatic disease, diabetes mellitus, arthritis,  
2 osteoporosis, cancer, and dyslipidemia.

3 Frailty will be assessed by the Kihon checklist (devised by the  
4 Japanese Ministry of Health, Labor and Welfare), which is a 25-item  
5 self-administered questionnaire designed to identify frail elderly  
6 individuals<sup>9</sup>. Previous studies have reported the validity of the Kihon  
7 checklist<sup>10-13</sup>.

8 Physical activity will be assessed by the Japan Public Health Centre  
9 Physical Activity Questionnaire (JPHC PAQ)<sup>14 15</sup>. This questionnaire  
10 includes information about the average daily amount of time and frequency  
11 spent in work-related (including commuting and housework) physical  
12 activity, leisure-time physical activity, and sleep<sup>14</sup>. The total physical  
13 activity level is calculated as metabolic equivalents of task-hours per day.  
14 The correlation between metabolic equivalents estimated by this  
15 questionnaire and daily activities reported in 24-hour records was 0.69<sup>14</sup>.

16 Transportation when going out will be assessed by asking the question  
17 “What kinds of transportation did you use more than twice per week when  
18 you went out in the last 1 month?”, for which available responses were:  
19 “walking”, “bicycle”, “motorbike”, “car”, “train”, “bus”, “taxi”, or “other”.

20 Education level will be assessed by asking the question applied in the  
21 2010 Population Census (Japan) “Please indicate the last school you

1 graduated from.”, for which available responses were: “primary school or  
2 junior high school”, “senior high school or middle school (under the old  
3 system of education)”, “junior college or higher professional school”,  
4 “college, university or graduate school”<sup>16</sup>.

5 Work will be assessed by asking the question “Do you do any paid  
6 work now?”, for which available responses were: “≥4 times/week”, “2-3  
7 times/week”, “1 time/week”, “1-3 times/month”, “few times/year”, or  
8 “none”.

9 Subjective household economic status will be assessed by asking the  
10 question “How do you feel about your current household economic  
11 situation?”, for which available responses will be: “most affluent”, “more  
12 affluent”, “neither more nor less”, “less affluent”, or “non-affluent”  
13 (selection from these 5 choices)<sup>17</sup>.

14 Time affluence (having spare time) will be assessed by asking the  
15 question “Do you have time affluence for rest or leisure in daily life?  
16 Alternatively, do not you have time affluence for work, housework, or  
17 studies?”, for which available responses will be: “more affluent”, “little  
18 affluent”, “less affluent”, or “non-affluent” (selection from these 5  
19 choices)<sup>18</sup>.

20 Falling will be assessed based on question no. 9 of the Kihon  
21 checklist “Have you experienced a fall in the last year?”<sup>9</sup>.

1 Pain will be assessed based on the question “How much pain have you  
2 experienced during the last 1 month?”, for which available responses will be:  
3 “none,” “very mild,” “mild,” “moderate,” “severe,” or “very severe”<sup>19</sup>.  
4 Location of the pain will be also ascertained, for which available responses  
5 will be: “shoulder”, “lower back” or “knee”.

6 Blood pressure in a seated position after 3 min of rest will be assessed  
7 using an automated sphygmomanometer HEM-1040 (Omron, Kyoto, Japan).  
8 Two measurements taken 3 min apart will be averaged for analysis.

#### 10 *Outcome measurements*

11 Daily steps will be counted by a pedometer FS-800 (ESTERA Corporation,  
12 Saitama, Japan) containing a 3-axis acceleration sensor. Data on daily steps  
13 will be automatically recorded in the pedometer for 90 days. Every 3 weeks,  
14 trained staffs will transfer data on the number of steps walked daily by  
15 participants recorded by the pedometer to a computer as a Comma-Separated  
16 Values file via the Near Field Communication function (not via internet). We  
17 will provide a clip-on holder for wearing the pedometer on the waist, and we  
18 explain to each participant how to use it. Because the pedometer will record  
19 0 steps if a participant forgets to wear it, we will instruct the participants to  
20 wear the pedometer at all times except when sleeping or taking a bath.

21 Because both effect and adverse effect resulting from falls and pain

1  
2  
3  
4 1 may be expected as a result of the intervention, we will check any tendencies  
5  
6  
7 2 for incident falls and pain.  
8

9  
10 3 Incident falls will be assessed based on question no. 9 of the Kihon  
11  
12 4 checklist. Because the assessment will be conducted every three weeks for  
13  
14  
15 5 follow-up, we will modify the timing of this question to “Have you fallen in  
16  
17  
18 6 the past three weeks?”. Incident falls are defined as new episodes of falling  
19  
20  
21 7 after the baseline.  
22

23 8 Incident pain will be assessed based on the question “How much pain  
24  
25  
26 9 have you experienced during the past three weeks?”, and expressed as a  
27  
28  
29 10 six-point verbal rating scale: “none,” “very mild,” “mild,” “moderate,”  
30  
31  
32 11 “severe,” and “very severe”. Incident pain is defined as worsening of pain  
33  
34  
35 12 severity after the baseline.  
36

37 13

#### 39 14 ***Primary outcome***

41  
42 15 The primary outcome is the average increase in the number of daily steps  
43  
44  
45 16 compared with the average number during the baseline period (**Table 1,**  
46  
47  
48 17 **Table 2**). We will thereby examine whether an increase of more than 1,302  
49  
50  
51 18 steps (mean value for sample size) can be expected, and the increase in the  
52  
53  
54 19 daily number of steps resulting from the financial incentive.  
55

56 20

#### 58 21 ***Secondary outcome***

1 The secondary outcomes will be 1) increase in the number of daily steps by  
2 1,000 or more in 4-6 weeks or 7-9 weeks from the baseline level (1-3 weeks);  
3 2) incident falls in 4-6 weeks or 7-9 weeks; and 3) incident pain in 4-6 weeks  
4 or 7-9 weeks (**Table 2**).

### 6 ***Statistical analyses***

7 To compare the primary outcome (average difference), t-test will be applied  
8 to examine whether the average daily increases in the number of steps 4-6  
9 weeks and 7-9 weeks from the baseline differ significantly between the  
10 intervention group and the control group.

11 For comparison of secondary outcomes between the intervention group  
12 and the waitlist control group at 4-6 weeks and 7-9 weeks, logistic regression  
13 models will be applied to examine whether the proportions of participants  
14 with an increase of 1000 steps or more are significantly different, and  
15 applied to assess the probabilities of incident falls and incident pain,  
16 respectively.

17 In addition, stratified analyses will be conducted to check for any  
18 differences in the number of steps in terms of sex, age, frailty, physical  
19 activity level, transportation when going out, education level, work,  
20 subjective economic status, time affluence (having spare time), pain, and  
21 obesity.



1  
2  
3  
4 1 To apply the intention-to-treat principle, multiple imputations will be  
5  
6  
7 2 conducted to consider the effects of missing values on outcome variables.  
8

9  
10 3 All of the above analyses will be performed using SAS version 9.4  
11  
12 4 (SAS Institute Inc. North Carolina, USA).  
13  
14  
15  
16  
17  
18  
19  
20  
21  
22  
23  
24  
25  
26  
27  
28  
29  
30  
31  
32  
33  
34  
35  
36  
37  
38  
39  
40  
41  
42  
43  
44  
45  
46  
47  
48  
49  
50  
51  
52  
53  
54  
55  
56  
57  
58  
59  
60

For peer review only

## 1 ETHICS AND DISSEMINATION

### 2 *Ethical considerations*

3 The ethics committee of Tohoku University Graduate School of Medicine  
4 (Sendai, Japan) has reviewed and approved the study protocol (No.  
5 2018-1-171).

6 The investigator will explain the research proposal along with the  
7 documents, and provide enough time for individuals to consider their  
8 participation. Handwritten signatures will be required on the consent  
9 document. The consent form will guarantee protection of personal  
10 information, and use of the dataset only for academic purposes. Consent  
11 documents will be kept by the principal investigator, and copies will be  
12 given to the participants.

13 All data on participants will be managed by use of an ID number.  
14 Personal information will be strictly managed at Tohoku University Graduate  
15 School of Medicine. Personal information will be deleted from the dataset for  
16 statistical analysis. After the research period, participant's information data  
17 will be disposed of in a prescribed way.

18 Because this trial is a noninvasive intervention, no Data Monitoring  
19 Committee will be organized.

20 If the research protocol needs to change, the principal investigator  
21 must obtain approval from the chief of the research institution through the

1  
2  
3  
4  
5  
6  
7  
8  
9  
10  
11  
12  
13  
14  
15  
16  
17  
18  
19  
20  
21  
22  
23  
24  
25  
26  
27  
28  
29  
30  
31  
32  
33  
34  
35  
36  
37  
38  
39  
40  
41  
42  
43  
44  
45  
46  
47  
48  
49  
50  
51  
52  
53  
54  
55  
56  
57  
58  
59  
60

1 ethical review committee.

For peer review only

1  
2  
3  
4 1 ***Dissemination of research findings***  
5

6  
7 2 Results and findings will be submitted and published in a peer-reviewed  
8  
9 3 scientific journal according to the guidelines of CONSORT for RCTs.  
10

11  
12 4 Conflicts of interest among researchers is managed by the Conflict of  
13  
14 5 Interest Management Committee at Tohoku University.  
16

17  
18 6  
19  
20 7 **Patient and public involvement**  
21

22  
23 8 To improve feasibility about the protocol of this trial in Nakayama area, we  
24  
25 9 discussed with members of Nakayama Community Development Center  
26  
27 10 (nonprofit organization corporation) and members of Nakayama Shopping  
28  
29 11 Street Promotion Association. Additionally, members of Nakayama  
30  
31 12 Neighborhood Association are involved to announce about the recruitment.  
32  
33 13 After the end of the trial, as a collaborative program with Nakayama  
34  
35 14 Community Development Center and Nakayama Shopping Street Promotion  
36  
37 15 Association, we will hold the debrief session for study report to share results  
38  
39 16 of the trail.  
40  
41  
42  
43  
44  
45  
46  
47  
48  
49  
50  
51  
52  
53  
54  
55  
56  
57  
58  
59  
60

1  
2  
3  
4 1 **DISCUSSION**  
5

6 2 This protocol outlines the objectives of the study and explains the study  
7  
8  
9 3 design.  
10

11  
12 4 If this study is conducted in accordance with the present plan, the  
13  
14  
15 5 present study would be first RCT for examining the effect of financial  
16  
17 6 incentives for increasing the number of daily steps in Asian population.  
18

19  
20 7 This study has several limitations. First, the intervention involves  
21  
22  
23 8 only one type of financial incentive. Thus, the effect of a change in the  
24  
25  
26 9 corresponding financial incentive or its application (e.g. donation) would be  
27  
28  
29 10 unclear. Second, only short-term effects during 9 weeks will be evaluated.  
30  
31 11 Thus, the long-term effect (maintaining a higher number of daily walking  
32  
33  
34 12 steps) of the financial incentive would be unclear. Third, a volunteer bias  
35  
36  
37 13 may exist in the present study. Participants may be more highly motivated to  
38  
39  
40 14 achieve the financial incentive goals in comparison with the total population  
41  
42 15 in the study area. Therefore, the external validity toward non-participants  
43  
44  
45 16 (involuntary participants) will be unclear.  
46  
47  
48 17  
49  
50  
51  
52  
53  
54  
55  
56  
57  
58  
59  
60

1 **Authors' contributions:** Ichiro Tsuji supervised this study and is the  
2 guarantor. Yasutake Tomata, Fumiya Tanji and Ichiro Tsuji have made were  
3 involved in the design. Yasutake Tomata, Dieta Nurrika, Yingxu Liu and Shu  
4 Zhang prepared draft manuscript. Saho Abe, Kouichi Matsumoto, Shu Zhang,  
5 Yumika Kotaki, Sanae Matsuyama, Yukai Lu, Yumi Sugawara, Shino Bando,  
6 Teiichiro Yamazaki, Tatsui Otsuka, and Toshimasa Sone revised the  
7 manuscript. Yasutake Tomata carried out the statistical calculation. All  
8 authors approved submission of this manuscript.

9 **Competing interests:** The authors have no financial disclosures in  
10 association with this study.

11 **Ethical approval:** The study protocol was reviewed and approved by the  
12 Ethics Committee of Tohoku University Graduate School of Medicine.

13 **Provenance and peer review:** Not commissioned; externally peer reviewed.

14 **Funding:** This work was supported by TERUMO Foundation for Life  
15 Sciences and Arts.

16 **Copyright:** The Corresponding Author has the right to grant on behalf of all  
17 authors and does grant on behalf of all authors, an exclusive licence ( or non  
18 exclusive for government employees) on a worldwide basis to the BMJ  
19 Publishing Group Ltd and its Licensees to permit this article (if  
20 accepted) to be published in BMJ OPEN editions and any other BMJ PGL  
21 products to exploit all subsidiary rights, as set out in our licence ( <http://>

1  
2  
3  
4  
5  
6  
7  
8  
9  
10  
11  
12  
13  
14  
15  
16  
17  
18  
19  
20  
21  
22  
23  
24  
25  
26  
27  
28  
29  
30  
31  
32  
33  
34  
35  
36  
37  
38  
39  
40  
41  
42  
43  
44  
45  
46  
47  
48  
49  
50  
51  
52  
53  
54  
55  
56  
57  
58  
59  
60

1 group.bmj.com/ products/ journals/instructions-for-authors/licence-forms/)

For peer review only

## References

1. Committee PAGA. 2018 Physical Activity Guidelines Advisory Committee Scientific Report. Washington, DC: U.S. Department of Health and Human Services 2018.
2. Organization WH. Global action plan on physical activity 2018–2030: more active people for a healthier world 2018 [Available from: <http://www.who.int/iris/handle/10665/272722>].
3. Miyachi M, Tripette J, Kawakami R, et al. "+10 min of Physical Activity per Day": Japan Is Looking for Efficient but Feasible Recommendations for Its Population. *J Nutr Sci Vitaminol (Tokyo)* 2015;61 Suppl:S7-9. doi: 10.3177/jnsv.61.S7 [published Online First: 2015/11/26]
4. Nishi N. Monitoring Obesity Trends in Health Japan 21. *J Nutr Sci Vitaminol (Tokyo)* 2015;61 Suppl:S17-9. doi: 10.3177/jnsv.61.S17 [published Online First: 2015/11/26]
5. The Ministry of Health LaWiJ. Guideline of financial incentives for health promotion 2016
6. Giles EL, Robalino S, McColl E, et al. The effectiveness of financial incentives for health behaviour change: systematic review and meta-analysis. *PLoS One* 2014;9(3):e90347. doi: 10.1371/journal.pone.0090347 [published Online First: 2014/03/13]
7. Harkins KA, Kullgren JT, Bellamy SL, et al. A Trial of Financial and Social Incentives to Increase Older Adults' Walking. *Am J Prev Med* 2017;52(5):e123-e30. doi: 10.1016/j.amepre.2016.11.011 [published Online First: 2017/01/08]
8. Patel MS, Asch DA, Rosin R, et al. Individual Versus Team-Based Financial Incentives to Increase Physical Activity: A Randomized, Controlled Trial. *J Gen Intern Med* 2016;31(7):746-54. doi: 10.1007/s11606-016-3627-0 [published



- 1 Online First: 2016/03/16]
- 2
- 3
- 4 1 Online First: 2016/03/16]
- 5
- 6 2 9. Arai H, Satake S. English translation of the Kihon Checklist. *Geriatr Gerontol*
- 7
- 8 3 *Int* 2015;15(4):518-9. doi: 10.1111/ggi.12397
- 9
- 10 4 10. Satake S, Senda K, Hong YJ, et al. Validity of the Kihon Checklist for
- 11
- 12 5 assessing frailty status. *Geriatr Gerontol Int* 2015 doi: 10.1111/ggi.12543
- 13
- 14 6 [published Online First: 2015/07/15]
- 15
- 16 7 11. Sewo Sampaio PY, Sampaio RA, Yamada M, et al. Validation and translation
- 17
- 18 8 of the Kihon Checklist (frailty index) into Brazilian Portuguese. *Geriatr*
- 19
- 20 9 *Gerontol Int* 2014;14(3):561-9. doi: 10.1111/ggi.12134
- 21
- 22 10 12. Fukutomi E, Okumiya K, Wada T, et al. Relationships between each category
- 23
- 24 11 of 25-item frailty risk assessment (Kihon Checklist) and newly certified older
- 25
- 26 12 adults under Long-Term Care Insurance: A 24-month follow-up study in a rural
- 27
- 28 13 community in Japan. *Geriatr Gerontol Int* 2015;15(7):864-71. doi:
- 29
- 30 14 10.1111/ggi.12360
- 31
- 32 15 13. Tomata Y, Hozawa A, Ohmori-Matsuda K, et al. [Validation of the Kihon
- 33
- 34 16 Checklist for predicting the risk of 1-year incident long-term care insurance
- 35
- 36 17 certification: the Ohsaki Cohort 2006 Study]. *Nihon Koshu Eisei Zasshi*
- 37
- 38 18 2011;58(1):3-13.
- 39
- 40 19 14. Fujii H, Yamamoto S, Takeda-Imai F, et al. Validity and applicability of a
- 41
- 42 20 simple questionnaire for the estimation of total and domain-specific physical
- 43
- 44 21 activity. *Diabetology International* 2011;2(2):47-54. doi:
- 45
- 46 22 10.1007/s13340-011-0025-z
- 47
- 48 23 15. Sasai H, Nakata Y, Murakami H, et al. Simultaneous Validation of Seven
- 49
- 50 24 Physical Activity Questionnaires Used in Japanese Cohorts for Estimating
- 51
- 52 25 Energy Expenditure: A Doubly Labeled Water Study. *J Epidemiol* 2018 doi:
- 53
- 54 26 10.2188/jea.JE20170129 [published Online First: 2018/05/02]
- 55
- 56 27 16. Communications MoIAa. Population Census 1996 [Available from:
- 57
- 58 28 <http://www.stat.go.jp/english/data/kokusei/index.html>.
- 59
- 60

(Study protocol R1)  
page. 29

- 1  
2  
3  
4 1 17. Tomata Y, Tanno K, Zhang S, et al. Subjective Household Economic Status and  
5  
6 2 Obesity in Toddlers: A Cross-Sectional Study of Daycare Centers in Japan.  
7  
8 3 *Journal of epidemiology* 2019;29(1):33-37. doi: 10.2188/jea.JE20170081  
9  
10 4 [published Online First: 2018/06/12]  
11  
12 5 18. Tomata Y, Tanno K, Zhang S, et al. Subjective Household Economic Status and  
13  
14 6 Obesity in Toddlers: A Cross-Sectional Study of Daycare Centers in Japan. *J*  
15  
16 7 *Epidemiol* 2018 doi: 10.2188/jea.JE20170081 [published Online First:  
17  
18 8 2018/06/12]  
19  
20 9 19. Kaiho Y, Sugawara Y, Sugiyama K, et al. Impact of Pain on Incident Risk of  
21  
22 10 Disability in Elderly Japanese: Cause-specific Analysis. *Anesthesiology*  
23  
24 11 2017;126(4):688-96. doi: 10.1097/aln.0000000000001540 [published Online  
25  
26 12 First: 2017/02/10]  
27  
28  
29  
30  
31  
32  
33  
34  
35  
36  
37  
38  
39  
40  
41  
42  
43  
44  
45  
46  
47  
48  
49  
50  
51  
52  
53  
54  
55  
56  
57  
58  
59  
60

1  
2  
3  
4  
5  
6  
7  
8  
9  
10  
11  
12  
13  
14  
15  
16  
17  
18  
19  
20  
21  
22  
23  
24  
25  
26  
27  
28  
29  
30  
31  
32  
33  
34  
35  
36  
37  
38  
39  
40  
41  
42  
43  
44  
45  
46  
47  
48  
49  
50  
51  
52  
53  
54  
55  
56  
57  
58  
59  
60

1 **Figure 1:** Flow chart of the study procedure.

For peer review only

1 **Table 1:** Time line for the evaluation.

| <b>Time line</b> | <b>Purpose of evaluation</b>             | <b>Hypothesis</b>                                                                                                                |
|------------------|------------------------------------------|----------------------------------------------------------------------------------------------------------------------------------|
| 1-3 weeks        | Baseline number of steps                 |                                                                                                                                  |
| 4-6 weeks        | Effect of incentive                      | Is the number of steps in the intervention group higher than that in the control group?                                          |
| 7-9 weeks        | Sustained effect of incentive            | Does the number of steps in the intervention group remain higher than that in the control group even after the incentive period? |
| 10-12 weeks      | Chance for waitlist control <sup>a</sup> |                                                                                                                                  |

a. Period for providing a chance of financial incentive for the waitlist control group. Thus, this period will not be included in the statistical analysis of this trial.

2

1 **Table 2:** Study outcomes.

| Measurement                                           | Definition                                                                                                  |
|-------------------------------------------------------|-------------------------------------------------------------------------------------------------------------|
| <b>Primary outcome</b>                                |                                                                                                             |
| – Increase in number of steps                         | Mean increase in the average number of steps (in 4-6 weeks or 7-9 weeks) compared with the baseline number. |
| <b>Secondary outcome</b>                              |                                                                                                             |
| – Proportion of participants who increase their steps | Proportion of participants who increase their average number of steps by 1,000 from the baseline.           |
| – Incident falls                                      | Incident rate of falls in 4-6 weeks or 7-9 weeks.                                                           |
| – Incident pain                                       | Incident rate of pain in 4-6 weeks or 7-9 weeks.                                                            |

2

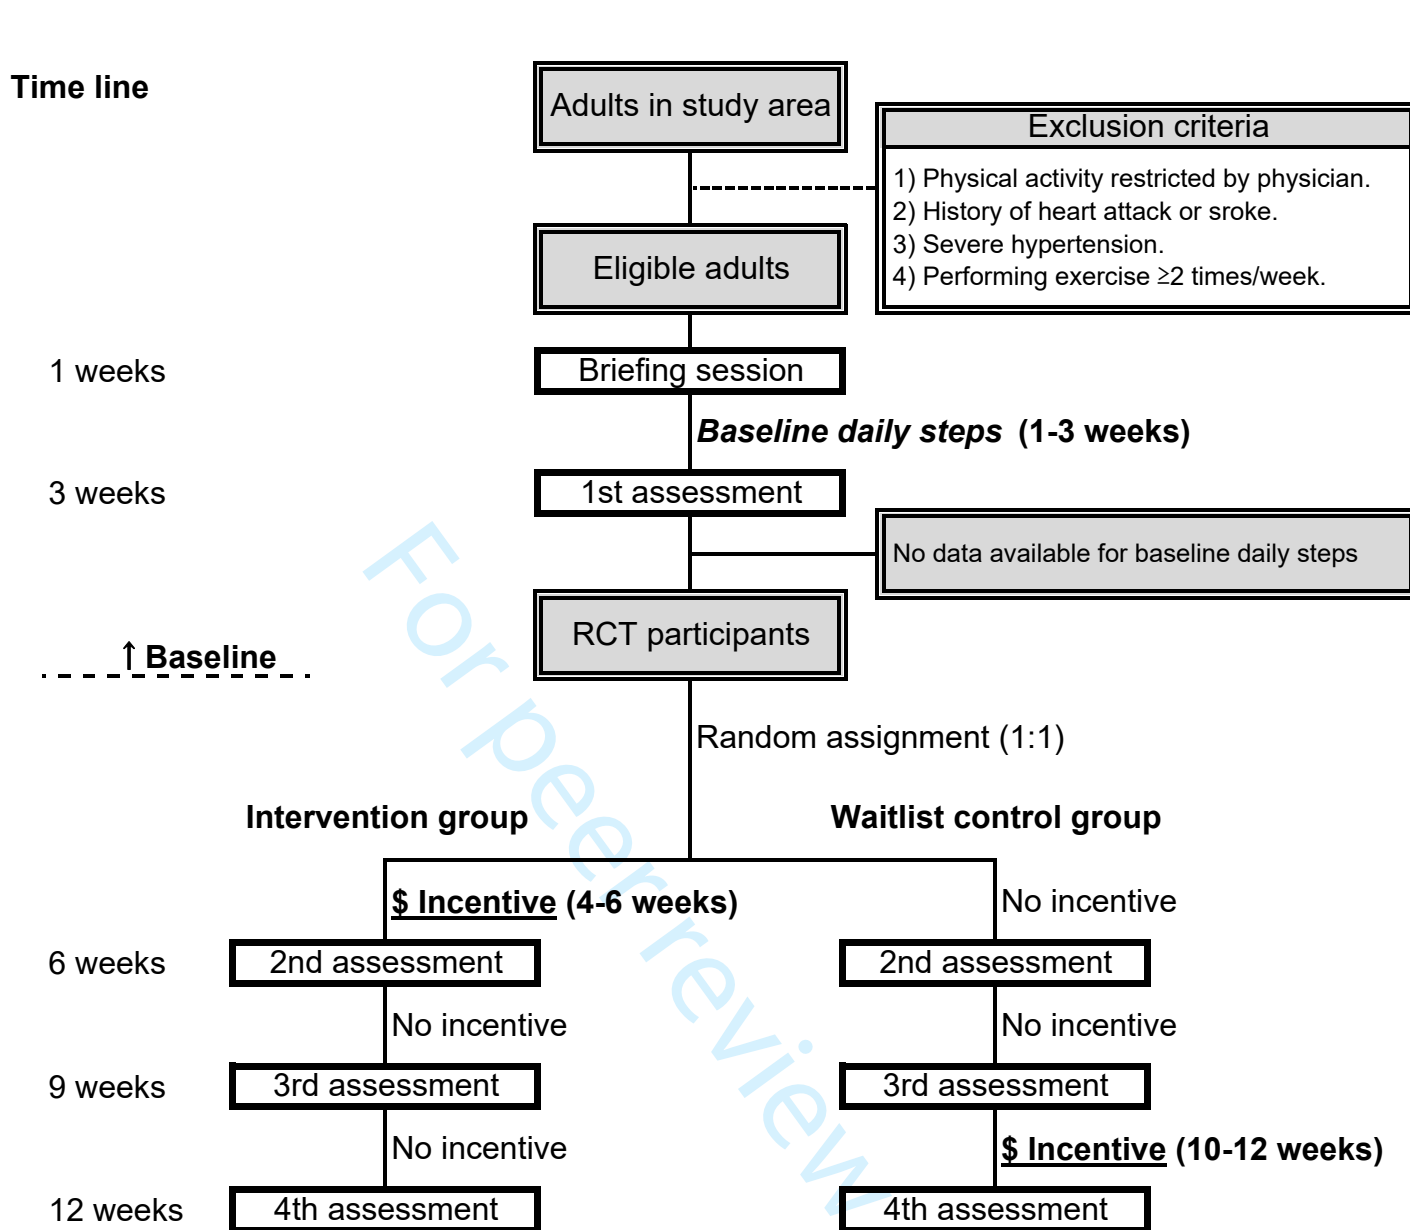

1 SPIRIT 2013 Checklist: Recommended items to address in a clinical trial protocol and related documents

2 [Randomized controlled trial of a financial incentive for increasing the number of daily walking steps: Study protocol](#)

| Section/item                                              | Item No | Description                                                                                                                                                                                                                                                                                                                                                                    | Page, line     |
|-----------------------------------------------------------|---------|--------------------------------------------------------------------------------------------------------------------------------------------------------------------------------------------------------------------------------------------------------------------------------------------------------------------------------------------------------------------------------|----------------|
| <b>Administrative information</b>                         |         |                                                                                                                                                                                                                                                                                                                                                                                |                |
| Title                                                     | 1       | Descriptive title identifying the study design, population, interventions, and, if applicable, trial acronym                                                                                                                                                                                                                                                                   | Page 1, line 2 |
| Trial registration                                        | 2a      | Trial identifier and registry name. If not yet registered, name of intended registry                                                                                                                                                                                                                                                                                           | Page 4         |
|                                                           | 2b      | All items from the World Health Organization Trial Registration Data Set                                                                                                                                                                                                                                                                                                       | N/A            |
| Protocol version                                          | 3       | Date and version identifier                                                                                                                                                                                                                                                                                                                                                    | Page 1         |
| Funding                                                   | 4       | Sources and types of financial, material, and other support                                                                                                                                                                                                                                                                                                                    | Page 23        |
| Roles and responsibilities                                | 5a      | Names, affiliations, and roles of protocol contributors                                                                                                                                                                                                                                                                                                                        | Page 23        |
|                                                           | 5b      | Name and contact information for the trial sponsor                                                                                                                                                                                                                                                                                                                             | Page 23        |
|                                                           | 5c      | Role of study sponsor and funders, if any, in study design; collection, management, analysis, and interpretation of data; writing of the report; and the decision to submit the report for publication, including whether they will have ultimate authority over any of these activities                                                                                       |                |
|                                                           | 5d      | Composition, roles, and responsibilities of the coordinating centre, steering committee, endpoint adjudication committee, data management team, and other individuals or groups overseeing the trial, if applicable (see Item 21a for data monitoring committee)                                                                                                               | N/A            |
| <b>Introduction</b>                                       |         |                                                                                                                                                                                                                                                                                                                                                                                |                |
| Background and rationale                                  | 6a      | Description of research question and justification for undertaking the trial, including summary of relevant studies (published and unpublished) examining benefits and harms for each intervention                                                                                                                                                                             | Page 6         |
|                                                           | 6b      | Explanation for choice of comparators                                                                                                                                                                                                                                                                                                                                          | Page 6         |
| Objectives                                                | 7       | Specific objectives or hypotheses                                                                                                                                                                                                                                                                                                                                              | Page 7         |
| Trial design                                              | 8       | Description of trial design including type of trial (eg, parallel group, crossover, factorial, single group), allocation ratio, and framework (eg, superiority, equivalence, noninferiority, exploratory)                                                                                                                                                                      | Page 8         |
| <b>Methods: Participants, interventions, and outcomes</b> |         |                                                                                                                                                                                                                                                                                                                                                                                |                |
| Study setting                                             | 9       | Description of study settings (eg, community clinic, academic hospital) and list of countries where data will be collected. Reference to where list of study sites can be obtained                                                                                                                                                                                             | Page 8         |
| Eligibility criteria                                      | 10      | Inclusion and exclusion criteria for participants. If applicable, eligibility criteria for study centres and individuals who will perform the interventions (eg, surgeons, psychotherapists)                                                                                                                                                                                   | Page 8         |
| Interventions                                             | 11a     | Interventions for each group with sufficient detail to allow replication, including how and when they will be administered                                                                                                                                                                                                                                                     | Page 9         |
|                                                           | 11b     | Criteria for discontinuing or modifying allocated interventions for a given trial participant (eg, drug dose change in response to harms, participant request, or improving/worsening disease)                                                                                                                                                                                 | N/A            |
|                                                           | 11c     | Strategies to improve adherence to intervention protocols, and any procedures for monitoring adherence (eg, drug tablet return, laboratory tests)                                                                                                                                                                                                                              | N/A            |
|                                                           | 11d     | Relevant concomitant care and interventions that are permitted or prohibited during the trial                                                                                                                                                                                                                                                                                  | N/A            |
| Outcomes                                                  | 12      | Primary, secondary, and other outcomes, including the specific measurement variable (eg, systolic blood pressure), analysis metric (eg, change from baseline, final value, time to event), method of aggregation (eg, median, proportion), and time point for each outcome. Explanation of the clinical relevance of chosen efficacy and harm outcomes is strongly recommended | Page 18        |
| Participant timeline                                      | 13      | Time schedule of enrolment, interventions (including any run-ins and washouts), assessments, and visits for participants. A schematic diagram is highly recommended (see Figure)                                                                                                                                                                                               | Page 10        |
| Sample size                                               | 14      | Estimated number of participants needed to achieve study objectives and how it was determined, including clinical and statistical assumptions supporting any sample size calculations                                                                                                                                                                                          | Page 12        |
| Recruitment                                               | 15      | Strategies for achieving adequate participant enrolment to reach target sample size                                                                                                                                                                                                                                                                                            | Page 8         |

| <b>Methods: Assignment of interventions (for controlled trials)</b> |     |                                                                                                                                                                                                                                                                                                                                                                                                              |         |
|---------------------------------------------------------------------|-----|--------------------------------------------------------------------------------------------------------------------------------------------------------------------------------------------------------------------------------------------------------------------------------------------------------------------------------------------------------------------------------------------------------------|---------|
| Allocation:                                                         |     |                                                                                                                                                                                                                                                                                                                                                                                                              |         |
| Sequence generation                                                 | 16a | Method of generating the allocation sequence (eg, computer-generated random numbers), and list of any factors for stratification. To reduce predictability of a random sequence, details of any planned restriction (eg, blocking) should be provided in a separate document that is unavailable to those who enrol participants or assign interventions                                                     | Page 13 |
| Allocation concealment mechanism                                    | 16b | Mechanism of implementing the allocation sequence (eg, central telephone; sequentially numbered, opaque, sealed envelopes), describing any steps to conceal the sequence until interventions are assigned                                                                                                                                                                                                    | Page 13 |
| Implementation                                                      | 16c | Who will generate the allocation sequence, who will enrol participants, and who will assign participants to interventions                                                                                                                                                                                                                                                                                    | Page 13 |
| Blinding (masking)                                                  | 17a | Who will be blinded after assignment to interventions (eg, trial participants, care providers, outcome assessors, data analysts), and how                                                                                                                                                                                                                                                                    | Page 14 |
|                                                                     | 17b | If blinded, circumstances under which unblinding is permissible, and procedure for revealing a participant's allocated intervention during the trial                                                                                                                                                                                                                                                         | N/A     |
| <b>Methods: Data collection, management, and analysis</b>           |     |                                                                                                                                                                                                                                                                                                                                                                                                              |         |
| Data collection methods                                             | 18a | Plans for assessment and collection of outcome, baseline, and other trial data, including any related processes to promote data quality (eg, duplicate measurements, training of assessors) and a description of study instruments (eg, questionnaires, laboratory tests) along with their reliability and validity, if known. Reference to where data collection forms can be found, if not in the protocol | Page 14 |
|                                                                     | 18b | Plans to promote participant retention and complete follow-up, including list of any outcome data to be collected for participants who discontinue or deviate from intervention protocols                                                                                                                                                                                                                    | N/A     |
| Data management                                                     | 19  | Plans for data entry, coding, security, and storage, including any related processes to promote data quality (eg, double data entry; range checks for data values). Reference to where details of data management procedures can be found, if not in the protocol                                                                                                                                            | Page 14 |
| Statistical methods                                                 | 20a | Statistical methods for analysing primary and secondary outcomes. Reference to where other details of the statistical analysis plan can be found, if not in the protocol                                                                                                                                                                                                                                     | Page 19 |
|                                                                     | 20b | Methods for any additional analyses (eg, subgroup and adjusted analyses)                                                                                                                                                                                                                                                                                                                                     | Page 19 |
|                                                                     | 20c | Definition of analysis population relating to protocol non-adherence (eg, as randomised analysis), and any statistical methods to handle missing data (eg, multiple imputation)                                                                                                                                                                                                                              | Page 19 |
| <b>Methods: Monitoring</b>                                          |     |                                                                                                                                                                                                                                                                                                                                                                                                              |         |
| Data monitoring                                                     | 21a | Composition of data monitoring committee (DMC); summary of its role and reporting structure; statement of whether it is independent from the sponsor and competing interests; and reference to where further details about its charter can be found, if not in the protocol.                                                                                                                                 | Page 20 |
|                                                                     |     | Alternatively, an explanation of why a DMC is not needed                                                                                                                                                                                                                                                                                                                                                     | Page 20 |
|                                                                     | 21b | Description of any interim analyses and stopping guidelines, including who will have access to these interim results and make the final decision to terminate the trial                                                                                                                                                                                                                                      | N/A     |
| Harms                                                               | 22  | Plans for collecting, assessing, reporting, and managing solicited and spontaneously reported adverse events and other unintended effects of trial interventions or trial conduct                                                                                                                                                                                                                            | Page 20 |
| Auditing                                                            | 23  | Frequency and procedures for auditing trial conduct, if any, and whether the process will be independent from investigators and the sponsor                                                                                                                                                                                                                                                                  | N/A     |



| <b>Ethics and dissemination</b> |     |                                                                                                                                                                                                                                                                                     |         |
|---------------------------------|-----|-------------------------------------------------------------------------------------------------------------------------------------------------------------------------------------------------------------------------------------------------------------------------------------|---------|
| Research ethics approval        | 24  | Plans for seeking research ethics committee/institutional review board (REC/IRB) approval                                                                                                                                                                                           | Page 20 |
| Protocol amendments             | 25  | Plans for communicating important protocol modifications (eg, changes to eligibility criteria, outcomes, analyses) to relevant parties (eg, investigators, REC/IRBs, trial participants, trial registries, journals, regulators)                                                    | Page 20 |
| Consent or assent               | 26a | Who will obtain informed consent or assent from potential trial participants or authorised surrogates, and how (see Item 32)                                                                                                                                                        | Page 20 |
|                                 | 26b | Additional consent provisions for collection and use of participant data and biological specimens in ancillary studies, if applicable                                                                                                                                               | N/A     |
| Confidentiality                 | 27  | How personal information about potential and enrolled participants will be collected, shared, and maintained in order to protect confidentiality before, during, and after the trial                                                                                                | Page 20 |
| Declaration of interests        | 28  | Financial and other competing interests for principal investigators for the overall trial and each study site                                                                                                                                                                       | Page 23 |
| Access to data                  | 29  | Statement of who will have access to the final trial dataset, and disclosure of contractual agreements that limit such access for investigators                                                                                                                                     | Page 14 |
| Ancillary and post-trial care   | 30  | Provisions, if any, for ancillary and post-trial care, and for compensation to those who suffer harm from trial participation                                                                                                                                                       | N/A     |
| Dissemination policy            | 31a | Plans for investigators and sponsor to communicate trial results to participants, healthcare professionals, the public, and other relevant groups (eg, via publication, reporting in results databases, or other data sharing arrangements), including any publication restrictions | Page 21 |
|                                 | 31b | Authorship eligibility guidelines and any intended use of professional writers                                                                                                                                                                                                      | Page 23 |
|                                 | 31c | Plans, if any, for granting public access to the full protocol, participant-level dataset, and statistical code                                                                                                                                                                     | N/A     |
| <b>Appendices</b>               |     |                                                                                                                                                                                                                                                                                     |         |
| Informed consent materials      | 32  | Model consent form and other related documentation given to participants and authorised surrogates                                                                                                                                                                                  | N/A     |
| Biological specimens            | 33  | Plans for collection, laboratory evaluation, and storage of biological specimens for genetic or molecular analysis in the current trial and for future use in ancillary studies, if applicable                                                                                      | N/A     |

\*It is strongly recommended that this checklist be read in conjunction with the SPIRIT 2013 Explanation & Elaboration for important clarification on the items. Amendments to the protocol should be tracked and dated. The SPIRIT checklist is copyrighted by the SPIRIT Group under the Creative Commons "Attribution-NonCommercial-NoDerivs 3.0 Unported" license.

# BMJ Open

## Randomized controlled trial of a financial incentive for increasing the number of daily walking steps: Study protocol

|                                 |                                                                                                                                                                                                                                                                                                                                                                                                                                                                                                                                                                                                                                                                                                                                                                                                                                                                                                                                                                                                                                                                                                                                                                                                                                                                                                                                                                                                                                                                                                                                                                                                                                                                                                                                                                                                                                                                                                                                                                                                                                                                                                                                                                         |
|---------------------------------|-------------------------------------------------------------------------------------------------------------------------------------------------------------------------------------------------------------------------------------------------------------------------------------------------------------------------------------------------------------------------------------------------------------------------------------------------------------------------------------------------------------------------------------------------------------------------------------------------------------------------------------------------------------------------------------------------------------------------------------------------------------------------------------------------------------------------------------------------------------------------------------------------------------------------------------------------------------------------------------------------------------------------------------------------------------------------------------------------------------------------------------------------------------------------------------------------------------------------------------------------------------------------------------------------------------------------------------------------------------------------------------------------------------------------------------------------------------------------------------------------------------------------------------------------------------------------------------------------------------------------------------------------------------------------------------------------------------------------------------------------------------------------------------------------------------------------------------------------------------------------------------------------------------------------------------------------------------------------------------------------------------------------------------------------------------------------------------------------------------------------------------------------------------------------|
| Journal:                        | <i>BMJ Open</i>                                                                                                                                                                                                                                                                                                                                                                                                                                                                                                                                                                                                                                                                                                                                                                                                                                                                                                                                                                                                                                                                                                                                                                                                                                                                                                                                                                                                                                                                                                                                                                                                                                                                                                                                                                                                                                                                                                                                                                                                                                                                                                                                                         |
| Manuscript ID                   | bmjopen-2018-026086.R2                                                                                                                                                                                                                                                                                                                                                                                                                                                                                                                                                                                                                                                                                                                                                                                                                                                                                                                                                                                                                                                                                                                                                                                                                                                                                                                                                                                                                                                                                                                                                                                                                                                                                                                                                                                                                                                                                                                                                                                                                                                                                                                                                  |
| Article Type:                   | Protocol                                                                                                                                                                                                                                                                                                                                                                                                                                                                                                                                                                                                                                                                                                                                                                                                                                                                                                                                                                                                                                                                                                                                                                                                                                                                                                                                                                                                                                                                                                                                                                                                                                                                                                                                                                                                                                                                                                                                                                                                                                                                                                                                                                |
| Date Submitted by the Author:   | 20-May-2019                                                                                                                                                                                                                                                                                                                                                                                                                                                                                                                                                                                                                                                                                                                                                                                                                                                                                                                                                                                                                                                                                                                                                                                                                                                                                                                                                                                                                                                                                                                                                                                                                                                                                                                                                                                                                                                                                                                                                                                                                                                                                                                                                             |
| Complete List of Authors:       | Tomata, Yasutake; Tohoku University School of Medicine, Division of Epidemiology, Department of Health Informatics and Public Health Tanji, Fumiya; Tohoku University School of Medicine, Division of Epidemiology, Department of Health Informatics and Public Health Nurrika, Dieta; Tohoku University School of Medicine, Division of Epidemiology, Department of Health Informatics and Public Health Liu, Yingxu; Tohoku University School of Medicine, Division of Epidemiology, Department of Health Informatics and Public Health Abe, Saho; Tohoku University School of Medicine, Division of Epidemiology, Department of Health Informatics and Public Health Matsumoto, Koichi; Tohoku University School of Medicine, Division of Epidemiology, Department of Health Informatics and Public Health Zhang, Shu; Tohoku University School of Medicine, Division of Epidemiology, Department of Health Informatics and Public Health Kotaki, Yumika; Tohoku University School of Medicine, Division of Epidemiology, Department of Health Informatics and Public Health Matsuyama, Sanae; Tohoku University School of Medicine, Division of Epidemiology, Department of Health Informatics and Public Health Lu, Yukai; Tohoku University School of Medicine, Division of Epidemiology, Department of Health Informatics and Public Health Sugawara, Yumi; Tohoku University School of Medicine, Division of Epidemiology, Department of Health Informatics and Public Health Bando, Shino; Tohoku University School of Medicine, Division of Epidemiology, Department of Health Informatics and Public Health Yamazaki, Teiichiro; Tohoku University School of Medicine, Division of Epidemiology, Department of Health Informatics and Public Health Otsuka, Tatsui; Tohoku University School of Medicine, Division of Epidemiology, Department of Health Informatics and Public Health Sone, Toshimasa; Tohoku University School of Medicine, Division of Epidemiology, Department of Health Informatics and Public Health Tsuji, Ichiro; Tohoku University School of Medicine, Division of Epidemiology, Department of Health Informatics and Public Health |
| <b>Primary Subject Heading</b>: | Epidemiology                                                                                                                                                                                                                                                                                                                                                                                                                                                                                                                                                                                                                                                                                                                                                                                                                                                                                                                                                                                                                                                                                                                                                                                                                                                                                                                                                                                                                                                                                                                                                                                                                                                                                                                                                                                                                                                                                                                                                                                                                                                                                                                                                            |
| Secondary Subject Heading:      | Public health, Sports and exercise medicine                                                                                                                                                                                                                                                                                                                                                                                                                                                                                                                                                                                                                                                                                                                                                                                                                                                                                                                                                                                                                                                                                                                                                                                                                                                                                                                                                                                                                                                                                                                                                                                                                                                                                                                                                                                                                                                                                                                                                                                                                                                                                                                             |
| Keywords:                       | EPIDEMIOLOGY, PUBLIC HEALTH, PREVENTIVE MEDICINE, SPORTS MEDICINE                                                                                                                                                                                                                                                                                                                                                                                                                                                                                                                                                                                                                                                                                                                                                                                                                                                                                                                                                                                                                                                                                                                                                                                                                                                                                                                                                                                                                                                                                                                                                                                                                                                                                                                                                                                                                                                                                                                                                                                                                                                                                                       |

1  
2  
3  
4  
5  
6  
7  
8  
9  
10  
11  
12  
13  
14  
15  
16  
17  
18  
19  
20  
21  
22  
23  
24  
25  
26  
27  
28  
29  
30  
31  
32  
33  
34  
35  
36  
37  
38  
39  
40  
41  
42  
43  
44  
45  
46  
47  
48  
49  
50  
51  
52  
53  
54  
55  
56  
57  
58  
59  
60



SCHOLARONE™  
Manuscripts

(Study protocol R2)  
page. 1

1  
2  
3  
4 1 **Title:**

5  
6 2 **Randomized controlled trial of a financial incentive for increasing the**  
7  
8 3 **number of daily walking steps: Study protocol**  
9  
10

11 4  
12  
13 5 **Authors:**

14  
15 6 Yasutake Tomata<sup>1</sup>, Fumiya Tanji<sup>1</sup>, Dieta Nurrika<sup>1</sup>, Yingxu Liu<sup>1</sup>, Saho Abe<sup>1</sup>,  
16  
17 7 Koichi Matsumoto<sup>1</sup>, Shu Zhang<sup>1</sup>, Yumika Kotaki<sup>1</sup>, Sanae Matsuyama<sup>1</sup>,  
18  
19 8 Yukai Lu<sup>1</sup>, Yumi Sugawara<sup>1</sup>, Shino Bando<sup>1</sup>, Teiichiro Yamazaki<sup>1</sup>,  
20  
21 9 Tatsui Otsuka<sup>1</sup>, Toshimasa Sone<sup>2</sup>, Ichiro Tsuji<sup>1</sup>  
22  
23  
24  
25

26 10  
27  
28 11 **Author's affiliations:**

29  
30 12 1: Division of Epidemiology, Department of Health Informatics and Public  
31  
32 13 Health, Tohoku University School of Public Health, Graduate School of  
33  
34 14 Medicine, Sendai, Japan.

35  
36  
37 15 2: Department of Rehabilitation, Faculty of Health Science, Tohoku Fukushi  
38  
39 16 University, Sendai, Japan.  
40  
41

42 17  
43  
44  
45 18 **Corresponding:**

46  
47 19 Yasutake Tomata

48  
49 20 Division of Epidemiology, Department of Health Informatics and Public  
50  
51 21 Health, Tohoku University School of Public Health, Graduate School of  
52  
53 22 Medicine 2-1, Seiryō-machi, Aoba-ku, Sendai, Miyagi 980-8575, Japan.  
54

55  
56  
57 23 Phone: +81-22-717-8123 Fax: +81-22-717-8125.

58  
59  
60 24 E-mail: [y-tomata@med.tohoku.ac.jp](mailto:y-tomata@med.tohoku.ac.jp)

1  
2  
3  
4  
5  
6  
7  
8  
9  
10  
11  
12  
13  
14  
15  
16  
17  
18  
19  
20  
21  
22  
23  
24  
25  
26  
27  
28  
29  
30  
31  
32  
33  
34  
35  
36  
37  
38  
39  
40  
41  
42  
43  
44  
45  
46  
47  
48  
49  
50  
51  
52  
53  
54  
55  
56  
57  
58  
59  
60

- 1 **Word count:**
- 2 # Word count for abstract: words: 251
- 3 # Word count for text: words: 3,342
- 4 # Number of references: 19
- 5 # Number of tables: 2
- 6 # Number of figure: 1
- 7 # Number of supplementary tables: 0

For peer review only

**ABSTRACT**

**Introduction:** Physical activity is one of the major modifiable factors for promotion of public health. Although it has been reported that financial incentives would be effective for promoting health behaviors such as smoking cessation or attendance for cancer screening, few randomized controlled trials (RCTs) have examined the effect of financial incentives for increasing the number of daily steps among individuals in a community setting. The aim of this study is to investigate the effects of financial incentives for increasing the number of daily steps among community-dwelling adults in Japan.

**Methods and analysis:** This study will be a two-arm, parallel-group RCT. We will recruit community-dwelling adults who are physically inactive in a suburban area (Nakayama) of Sendai city, Japan, using leaflets and posters. Participants that meet the inclusion criteria will be randomly allocated to an intervention group or a waitlist control group. The intervention group will be offered a financial incentive (a chance to get shopping points) if participants increase their daily steps from their baseline. The primary outcome will be the average increase in the number of daily steps (at 4-6 weeks and 7-9 weeks) relative to the average number of daily steps at the baseline (1-3 weeks). For the sample size calculation, we assumed that the difference of primary outcome would be 1,302 steps.

1  
2  
3  
4 1 **Ethics and dissemination:** This study has been ethically approved by the  
5  
6  
7 2 research ethics committee of Tohoku University Graduate School of  
8  
9  
10 3 Medicine, Japan (No. 2018-1-171). The results will be submitted and  
11  
12 4 published in a peer-reviewed scientific journal.  
13  
14  
15 5 **Registration:** UMIN000033276; Pre-results.  
16  
17  
18  
19  
20  
21  
22  
23  
24  
25  
26  
27  
28  
29  
30  
31  
32  
33  
34  
35  
36  
37  
38  
39  
40  
41  
42  
43  
44  
45  
46  
47  
48  
49  
50  
51  
52  
53  
54  
55  
56  
57  
58  
59  
60

For peer review only

## 1 **Strengths and limitations of this study**

- 2 ➤ This trial will examine the effectiveness of a financial incentive for  
3 increasing the number of daily walking steps.
- 4 ➤ The present study would be first Asian randomized controlled trials of  
5 financial incentives intervention.
- 6 ➤ Limitations include the fact that the intervention will be only one type of  
7 financial incentive.
- 8 ➤ Only short-term effects during 9 weeks will be evaluated.



## 1 INTRODUCTION

2 Physical activity is a major modifiable factor that has benefits in terms of  
3 physical and mental health<sup>1</sup>. Therefore public health strategies to increase  
4 physical activity are implemented worldwide<sup>2</sup>. In the Japanese National  
5 Health Promotion Movement ("Health Japan 21"), a higher number of daily  
6 walking steps is a target for physical activity<sup>3 4</sup>.

7       Recently, to encourage individuals who are not concerned about  
8 health-related behavior to increase the number of steps they walk daily, it  
9 has been suggested that offering them financial incentives might be an  
10 effective approach. The Ministry of Health, Labor and Welfare in Japan has  
11 provided a guideline for promotion of public health using financial  
12 incentives<sup>5</sup>. One such incentive is the introduction of a "health point system"  
13 in which local governments provide "shopping points" that can be redeemed  
14 in local stores when an individual achieves a health-related behavior goal  
15 such as an increase in the number of daily walking steps.

16       A systematic review (meta-analysis) has suggested that financial  
17 incentives would be effective for promotion of health behaviors such as  
18 smoking cessation, or attendance for vaccination or cancer screening<sup>6</sup>.

19       Although a few randomized controlled trials (financial incentives vs. no  
20 intervention) have examined the effect of financial incentives for increasing  
21 the amount of daily steps by individuals in a community setting, the results

(Study protocol R2)

page. 7

1 were not consistent<sup>7 8</sup>; One previous study reported that the target proportion  
2 of steps in the financial intervention group was significantly higher than that  
3 in the control group (relative risk =3.71) during the intervention period<sup>7</sup>,  
4 whereas another study reported that the mean proportion of days on which a  
5 7,000-steps goal was achieved as a result of individual incentive was not  
6 significantly higher than in the control group (0.25 vs 0.18)<sup>8</sup>.

7 The aim of the present study will be to examine the effect of offering  
8 a financial incentive for increasing the number of daily walking steps among  
9 physically inactive adults in a community setting.



1 Ability to walk unaided without using a cane, Zimmer frame, or wheelchair.

2 All the above inclusion criteria will be judged on the basis of self-reports  
3 from the participants.

4 Possession of the IC Card was considered to be an inclusion criterion  
5 because it was a means of providing the intervention (financial incentive).  
6 The IC Card was developed as a financial incentive to promote physical  
7 activity. Persons possessing the IC Card are given shopping points when they  
8 go shopping and participate in community activities in the Nakayama area.  
9 The IC Card is also intended to enhance social interaction with locals. The  
10 intervention in the present study is the first community activity project.

11 According to the 2015 Population Census, the number of adults (aged  
12 20 years or more) living in Nakayama area was 13,734 persons.

13

#### 14 ***Exclusion criteria***

15 Individuals who meet any of the following criteria will not be able to  
16 participate in the study: 1) Individuals whose physical activity is restricted  
17 by a physician, 2) History of heart attack or stroke within the last 6 months,  
18 3) Blood pressure exceeding 180 mmHg systolic or 110 mmHg diastolic, 4)  
19 Already habitually exercising (task of  $\geq 4$  metabolic equivalents) more than  
20 twice per week. All exclusion criteria except for blood pressure will be  
21 judged on the basis of self-reports from participants.

1  
2  
3  
4 1 ***Study procedure***

5  
6  
7 2 **Figure 1** illustrates the flow of the study procedure.

8  
9  
10 3 In the briefing session in September 2018, the inclusion and exclusion  
11  
12 4 criteria for each applicant will be rechecked by researchers in the study site  
13  
14  
15 5 (the Nakayama Tobinoko House). Chosen subjects will provide informed  
16  
17 6 consent to participate in the study. On the same day, blood pressure  
18  
19  
20 7 measurement, an interview using a questionnaire, and explanation about use  
21  
22  
23 8 of a pedometer will then be performed. At the briefing session, each  
24  
25  
26 9 participant will be provided with a pedometer.

27  
28  
29 10 The day after the briefing session will be the start date of steps  
30  
31 11 evaluation. We will perform evaluation and feedback about daily steps every  
32  
33  
34 12 3 weeks in the study site (the Nakayama Tobinoko House). All participants  
35  
36  
37 13 must wear the pedometer every day during the study period (12 weeks).

38  
39  
40 14 For all participants, the number of daily steps at the baseline will be  
41  
42 15 measured in first 3 weeks of the study period (**Table 1**). Then, participants  
43  
44  
45 16 who provide their data of daily steps will be randomly assigned to the  
46  
47  
48 17 intervention group or the control group (participants who provide any data  
49  
50 18 [ $\geq 1$  days] at the baseline will be included). At this stage, we assume that  
51  
52  
53 19 approximately 74 persons (i.e. the target sample size) would be included in  
54  
55  
56 20 the random assignment.

57  
58  
59 21 During the next 3 weeks (intervention period), the participants in the  
60

1 intervention group will be given a chance to gain a financial incentive if they  
2 achieve their daily steps goals (for definition of goals, see the next section).

3 During 7-9 weeks, a chance to gain a financial incentive will not be  
4 provided in both the intervention group and the control group. This period  
5 (7-9 weeks) is to examine whether the number of steps in the intervention  
6 group remain higher than that in the control group even after the incentive  
7 period (**Table 1**).

8 On the other hand, the control group will be given a chance to gain a  
9 financial incentive (mentioned above) in the last three weeks (9-12 weeks),  
10 and thereby all participants will have a fair opportunity to gain such an  
11 incentive. The data obtained at 10-12 weeks will not be used for analysis to  
12 evaluate the effect.

13

#### 14 ***Intervention***

15 The intervention is a financial incentive in the form of shopping points,  
16 which can be redeemed at facilities in the study area (14 facilities of  
17 Nakayama area). Two kinds of financial incentive will be offered:

- 18 1. If the average number of daily steps in the intervention period is  $\geq 6,000$ ,  
19 shopping points worth 1,000 Japanese yen will be awarded.
- 20 2. If the average number of daily steps during the intervention period  
21 increases by  $\geq 1,000$  from the baseline level, shopping points worth 1,000

1 Japanese yen will be awarded.

2 These daily step targets have already been applied in Japanese national  
3 health actions<sup>3 4</sup>. National Health Action of Japan has emphasized that an  
4 increase of 1,000 steps has some impact on population health, because it  
5 contributes to a 3.2% reduction in the average relative risk of  
6 non-communicable diseases, dementia, joint-musculoskeletal impairment,  
7 and mortality<sup>3</sup>. For example, if a person keeps walking 6,500 steps during  
8 both the baseline and intervention periods, only financial incentive “1”  
9 (1,000 Japanese yen worth of points) will be awarded. If a person walks  
10 3,000 steps in the baseline period and 4,000 steps in the intervention period,  
11 only financial incentive “2” (1,000 Japanese yen worth of points) will be  
12 awarded. If a person walks 5,000 steps in the baseline period and 7,000 steps  
13 in the intervention period, both financial incentives “1” and “2” (2,000  
14 Japanese yen worth of points) will be awarded. Based on the exchange rate  
15 on 31st August 2018, 2,000 Japanese yen was equivalent to 14.0 British  
16 Pounds.

17 All participants will be provided shopping points at the same time  
18 (after the end of the trial, i.e. the 12th week) regardless of the intervention  
19 period.

20  
21 ***Waitlist control group***

1  
2  
3  
4 1 The waitlist control group is also given a financial incentive in the last three  
5  
6 2 weeks (**Figure 1**). All conditions except for timing will be the same as for  
7  
8 the intervention group.  
9

#### 10 11 12 4 13 14 15 5 *Power and sample size*

16  
17 6 The sample size was estimated by reference to the average increase in the  
18  
19 7 number of daily steps in a previous study conducted in 2013<sup>7</sup>. The average  
20  
21 8 difference in the number of daily steps between the intervention group  
22  
23 9 (n=24) and the control group (n=16) was 1,302 (an increase of 2,348 steps in  
24  
25 10 the intervention group vs. an increase of 1,046 steps in the control group)  
26  
27 11 when the intervention group was given an incentive of \$20 (approximately  
28  
29 12 ¥2,000 at the time of the study in 2013). In this previous study, the standard  
30  
31 13 deviation in the control group of the increase was 1,711 steps.  
32  
33  
34  
35  
36  
37  
38

39 14 Therefore, we assumed the result that an average difference of 1,302  
40  
41 15 steps would be achieved in the intervention period (4-6 weeks) by offering a  
42  
43 16 financial incentive of ¥2,000, and setting the standard deviation at 1,711.  
44  
45 17 When an  $\alpha$  error of 0.05 and a statistical power of 0.90 was applied, the  
46  
47 18 minimum sample size was 74 persons (37 persons per group). Therefore, a  
48  
49 19 total number of 74 participants (37 participants in each group) was set as the  
50  
51 20 target sample size for analysis. When an  $\alpha$  error of 0.05 and statistical power  
52  
53 21 of 0.80 was applied with this sample size (37 participants in each group), an  
54  
55  
56  
57  
58  
59  
60



1  
2  
3  
4 1 average difference of  $\geq 1,130$  steps was detectable as statistically significant.  
5

## 6 2 ***Randomization***

7  
8  
9 3 After confirming their eligibility, enrolled participants will be assigned to  
10 4 one of the two groups (1:1 allocation) based on the permuted block method  
11  
12  
13  
14  
15 5 by computer-generated randomization. The allocation sequence will be  
16  
17 6 managed by two exclusive researchers of the random assignment.  
18  
19

## 20 7 21 22 23 8 ***Blinding***

24  
25  
26 9 A blinded endpoint evaluation design will be applied. Only researchers of the  
27  
28 10 random assignment can access the assignment data, and other staffs were  
29  
30  
31 11 blinded to the random assignment. The assignment information was managed  
32  
33  
34 12 in password-locked dedicated storage media. Notification of the assignment  
35  
36  
37 13 by the exclusive researchers of the random assignment will be conducted in a  
38  
39 14 closed room where is separated from the other examination places. In this  
40  
41  
42 15 notification process, the exclusive researchers of the random assignment will  
43  
44  
45 16 warn all participants not to talk about their assignment.  
46  
47

48 17 In addition, statistical analyses will be blinded to the assignment. The  
49  
50 18 exclusive researchers of the random assignment will not be involved with the  
51  
52  
53 19 statistical analysis.  
54  
55

## 56 20 57 58 21 ***Baseline characteristics***

1 Baseline characteristics will be assessed on the date of the briefing session.

2 Trained interviewers will conduct an interview to obtain information  
3 about medical history, frailty (the Kihon checklist), physical activity,  
4 transportation when going out, education level, work, subjective economic  
5 status, time affluence (having spare time), pain, and falling. We will also  
6 measure the blood pressure of each participant.

7 History of diseases will include stroke, hypertension, myocardial  
8 infarction, renal disease, hepatic disease, diabetes mellitus, arthritis,  
9 osteoporosis, cancer, and dyslipidemia.

10 Frailty will be assessed by the Kihon checklist (devised by the  
11 Japanese Ministry of Health, Labor and Welfare), which is a 25-item  
12 self-administered questionnaire designed to identify frail elderly  
13 individuals<sup>9</sup>. Previous studies have reported the validity of the Kihon  
14 checklist<sup>10-13</sup>.

15 Physical activity will be assessed by the Japan Public Health Centre  
16 Physical Activity Questionnaire (JPHC PAQ)<sup>14 15</sup>. This questionnaire  
17 includes information about the average daily amount of time and frequency  
18 spent in work-related (including commuting and housework) physical  
19 activity, leisure-time physical activity, and sleep<sup>14</sup>. The total physical  
20 activity level is calculated as metabolic equivalents of task-hours per day.  
21 The correlation between metabolic equivalents estimated by this

1 questionnaire and daily activities reported in 24-hour records was 0.69<sup>14</sup>.

2           Transportation when going out will be assessed by asking the question  
3 “What kinds of transportation did you use more than twice per week when  
4 you went out in the last 1 month?”, for which available responses were:  
5 “walking”, “bicycle”, “motorbike”, “car”, “train”, “bus”, “taxi”, or “other”.

6           Education level will be assessed by asking the question applied in the  
7 2010 Population Census (Japan) “Please indicate the last school you  
8 graduated from.”, for which available responses were: “primary school or  
9 junior high school”, “senior high school or middle school (under the old  
10 system of education)”, “junior college or higher professional school”,  
11 “college, university or graduate school”<sup>16</sup>.

12           Work will be assessed by asking the question “Do you do any paid  
13 work now?”, for which available responses were: “≥4 times/week”, “2-3  
14 times/week”, “1 time/week”, “1-3 times/month”, “few times/year”, or  
15 “none”.

16           Subjective household economic status will be assessed by asking the  
17 question “How do you feel about your current household economic  
18 situation?”, for which available responses will be: “most affluent”, “more  
19 affluent”, “neither more nor less”, “less affluent”, or “non-affluent”  
20 (selection from these 5 choices)<sup>17</sup>.

21           Time affluence (having spare time) will be assessed by asking the

1 question “Do you have time affluence for rest or leisure in daily life?  
2 Alternatively, do not you have time affluence for work, housework, or  
3 studies?”, for which available responses will be: “more affluent”, “little  
4 affluent”, “less affluent”, or “non-affluent” (selection from these 5  
5 choices)<sup>18</sup>.

6 Falling will be assessed based on question no. 9 of the Kihon  
7 checklist “Have you experienced a fall in the last year?”<sup>9</sup>.

8 Pain will be assessed based on the question “How much pain have you  
9 experienced during the last 1 month?”, for which available responses will be:  
10 “none,” “very mild,” “mild,” “moderate,” “severe,” or “very severe”<sup>19</sup>.  
11 Location of the pain will be also ascertained, for which available responses  
12 will be: “shoulder”, “lower back” or “knee”.

13 Blood pressure in a seated position after 3 min of rest will be assessed  
14 using an automated sphygmomanometer HEM-1040 (Omron, Kyoto, Japan).  
15 Two measurements taken 3 min apart will be averaged for analysis.

### 17 ***Outcome measurements***

18 Daily steps will be counted by a pedometer FS-800 (ESTERA Corporation,  
19 Saitama, Japan) containing a 3-axis acceleration sensor. Data on daily steps  
20 will be automatically recorded in the pedometer for 90 days. On the display  
21 of the pedometer, only daily steps in each of the last 14 days (not average

1  
2  
3  
4 1 steps for the selected period) can be checked. Every 3 weeks, trained staffs  
5  
6  
7 2 will transfer data on the number of steps walked daily recorded by the  
8  
9  
10 3 pedometer to a computer as a Comma-Separated Values file via the Near  
11  
12 4 Field Communication function (not via internet). We will provide a clip-on  
13  
14  
15 5 holder for wearing the pedometer on the waist, and we explain to each  
16  
17  
18 6 participant how to use it. Because the pedometer will record 0 steps if a  
19  
20  
21 7 participant forgets to wear it, we will instruct the participants to wear the  
22  
23 8 pedometer at all times except when sleeping or taking a bath.

24  
25  
26 9 Because both effect and adverse effect resulting from falls and pain  
27  
28  
29 10 may be expected as a result of the intervention, we will check any tendencies  
30  
31  
32 11 for incident falls and pain.

33  
34 12 Incident falls will be assessed based on question no. 9 of the Kihon  
35  
36  
37 13 checklist. Because the assessment will be conducted every three weeks for  
38  
39  
40 14 follow-up, we will modify the timing of this question to “Have you fallen in  
41  
42  
43 15 the past three weeks?”. Incident falls are defined as new episodes of falling  
44  
45 16 after the baseline.

46  
47  
48 17 Incident pain will be assessed based on the question “How much pain  
49  
50  
51 18 have you experienced during the past three weeks?”, and expressed as a  
52  
53  
54 19 six-point verbal rating scale: “none,” “very mild,” “mild,” “moderate,”  
55  
56  
57 20 “severe,” and “very severe”. Incident pain is defined as worsening of pain  
58  
59 21 severity after the baseline.  
60

1  
2  
3  
4 1  
5  
6  
7 2 **Primary outcome**  
8  
9 3 The primary outcome is the average increase in the number of daily steps  
10  
11  
12 4 compared with the average number during the baseline period (**Table 1**,  
13  
14  
15 5 **Table 2**). We will thereby examine whether an increase of more than 1,302  
16  
17  
18 6 steps in 4-6 weeks from the baseline level (mean value for sample size) can  
19  
20  
21 7 be expected, and the increase in the daily number of steps resulting from the  
22  
23  
24 8 financial incentive.  
25

26 9  
27  
28  
29 10 **Secondary outcome**

30  
31 11 The secondary outcomes will be 1) increase in the number of daily steps by  
32  
33  
34 12 1,000 or more in 4-6 weeks or 7-9 weeks from the baseline level (1-3 weeks);  
35  
36  
37 13 2) incident falls in 4-6 weeks or 7-9 weeks; and 3) incident pain in 4-6 weeks  
38  
39  
40 14 or 7-9 weeks (**Table 2**).  
41

42 15  
43  
44  
45 16 **Statistical analyses**

46  
47  
48 17 To compare the primary outcome (average difference), t-test will be applied  
49  
50  
51 18 to examine whether the average daily increases in the number of steps 4-6  
52  
53  
54 19 weeks and 7-9 weeks from the baseline differ significantly between the  
55  
56 20 intervention group and the control group.

57  
58  
59 21 For comparison of secondary outcomes between the intervention group  
60

1  
2  
3  
4 1 and the waitlist control group at 4-6 weeks and 7-9 weeks, logistic regression  
5  
6  
7 2 models will be applied to examine whether the proportions of participants  
8  
9  
10 3 with an increase of 1000 steps or more are significantly different, and  
11  
12 4 applied to assess the probabilities of incident falls and incident pain,  
13  
14  
15 5 respectively.

16  
17 6 In addition, stratified analyses will be conducted to check for any  
18  
19  
20 7 differences in the number of steps in terms of sex, age, frailty, physical  
21  
22  
23 8 activity level, transportation when going out, education level, work,  
24  
25  
26 9 subjective economic status, time affluence (having spare time), pain, and  
27  
28  
29 10 obesity.

30  
31 11 To apply the intention-to-treat principle, multiple imputations will be  
32  
33  
34 12 conducted to consider the effects of missing values on outcome variables.

35  
36  
37 13 All of the above analyses will be performed using SAS version 9.4  
38  
39  
40 14 (SAS Institute Inc. North Carolina, USA).

## 1 ETHICS AND DISSEMINATION

### 2 *Ethical considerations*

3 The ethics committee of Tohoku University Graduate School of Medicine  
4 (Sendai, Japan) has reviewed and approved the study protocol (No.  
5 2018-1-171).

6 The investigator will explain the research proposal along with the  
7 documents, and provide enough time for individuals to consider their  
8 participation. Handwritten signatures will be required on the consent  
9 document. The consent form will guarantee protection of personal  
10 information, and use of the dataset only for academic purposes. Consent  
11 documents will be kept by the principal investigator, and copies will be  
12 given to the participants.

13 All data on participants will be managed by use of an ID number.  
14 Personal information will be strictly managed at Tohoku University Graduate  
15 School of Medicine. Personal information will be deleted from the dataset for  
16 statistical analysis. After the research period, participant's information data  
17 will be disposed of in a prescribed way.

18 Because this trial is a noninvasive intervention, no Data Monitoring  
19 Committee will be organized.

20 If the research protocol needs to change, the principal investigator  
21 must obtain approval from the chief of the research institution through the



1  
2  
3  
4  
5  
6  
7  
8  
9  
10  
11  
12  
13  
14  
15  
16  
17  
18  
19  
20  
21  
22  
23  
24  
25  
26  
27  
28  
29  
30  
31  
32  
33  
34  
35  
36  
37  
38  
39  
40  
41  
42  
43  
44  
45  
46  
47  
48  
49  
50  
51  
52  
53  
54  
55  
56  
57  
58  
59  
60

1 ethical review committee.

For peer review only

1  
2  
3  
4 1 ***Dissemination of research findings***  
5

6  
7 2 Results and findings will be submitted and published in a peer-reviewed  
8  
9 3 scientific journal according to the guidelines of CONSORT for RCTs.

10  
11  
12 4 Conflicts of interest among researchers is managed by the Conflict of  
13  
14 5 Interest Management Committee at Tohoku University.  
16

17  
18 6  
19  
20 7 **Patient and public involvement**  
21

22  
23 8 To improve feasibility about the protocol of this trial in Nakayama area, we  
24  
25 9 discussed with members of Nakayama Community Development Center  
26  
27 10 (nonprofit organization corporation) and members of Nakayama Shopping  
28  
29 11 Street Promotion Association. Additionally, members of Nakayama  
30  
31 12 Neighborhood Association are involved to announce about the recruitment.  
32  
33 13 After the end of the trial, as a collaborative program with Nakayama  
34  
35 14 Community Development Center and Nakayama Shopping Street Promotion  
36  
37 15 Association, we will hold the debrief session for study report to share results  
38  
39 16 of the trail.  
40  
41  
42  
43  
44  
45  
46  
47  
48  
49  
50  
51  
52  
53  
54  
55  
56  
57  
58  
59  
60

1  
2  
3  
4 1 **DISCUSSION**  
5

6 2 This protocol outlines the objectives of the study and explains the study  
7  
8  
9 3 design.  
10

11  
12 4 If this study is conducted in accordance with the present plan, the  
13  
14  
15 5 present study would be first RCT for examining the effect of financial  
16  
17 6 incentives for increasing the number of daily steps in Asian population.  
18

19  
20 7 This study has several limitations. First, the intervention involves  
21  
22  
23 8 only one type of financial incentive. Thus, the effect of a change in the  
24  
25  
26 9 corresponding financial incentive or its application (e.g. donation) would be  
27  
28  
29 10 unclear. Second, only short-term effects during 9 weeks will be evaluated.  
30  
31  
32 11 Thus, the long-term effect (maintaining a higher number of daily walking  
33  
34 12 steps) of the financial incentive would be unclear. Third, a volunteer bias  
35  
36  
37 13 may exist in the present study. Participants may be more highly motivated to  
38  
39  
40 14 achieve the financial incentive goals in comparison with the total population  
41  
42 15 in the study area. Therefore, the external validity toward non-participants  
43  
44  
45 16 (involuntary participants) will be unclear.  
46  
47  
48 17  
49  
50  
51  
52  
53  
54  
55  
56  
57  
58  
59  
60

1 **Authors' contributions:** Ichiro Tsuji supervised this study and is the  
2 guarantor. Yasutake Tomata, Fumiya Tanji and Ichiro Tsuji have made were  
3 involved in the design. Yasutake Tomata, Dieta Nurrika, Yingxu Liu and Shu  
4 Zhang prepared draft manuscript. Saho Abe, Kouichi Matsumoto, Shu Zhang,  
5 Yumika Kotaki, Sanae Matsuyama, Yukai Lu, Yumi Sugawara, Shino Bando,  
6 Teiichiro Yamazaki, Tatsui Otsuka, and Toshimasa Sone revised the  
7 manuscript. Yasutake Tomata carried out the statistical calculation. All  
8 authors approved submission of this manuscript.

9 **Competing interests:** The authors have no financial disclosures in  
10 association with this study.

11 **Ethical approval:** The study protocol was reviewed and approved by the  
12 Ethics Committee of Tohoku University Graduate School of Medicine.

13 **Provenance and peer review:** Not commissioned; externally peer reviewed.

14 **Funding:** This work was supported by TERUMO Foundation for Life  
15 Sciences and Arts.

16 **Copyright:** The Corresponding Author has the right to grant on behalf of all  
17 authors and does grant on behalf of all authors, an exclusive licence ( or non  
18 exclusive for government employees) on a worldwide basis to the BMJ  
19 Publishing Group Ltd and its Licensees to permit this article (if  
20 accepted) to be published in BMJ OPEN editions and any other BMJ PGL  
21 products to exploit all subsidiary rights, as set out in our licence ( <http://>

1  
2  
3  
4  
5  
6  
7  
8  
9  
10  
11  
12  
13  
14  
15  
16  
17  
18  
19  
20  
21  
22  
23  
24  
25  
26  
27  
28  
29  
30  
31  
32  
33  
34  
35  
36  
37  
38  
39  
40  
41  
42  
43  
44  
45  
46  
47  
48  
49  
50  
51  
52  
53  
54  
55  
56  
57  
58  
59  
60

1 group.bmj.com/ products/ journals/instructions-for-authors/licence-forms/)

For peer review only

## 1 **References**

- 2 1. Committee PAGA. 2018 Physical Activity Guidelines Advisory Committee  
3 Scientific Report. Washington, DC: U.S. Department of Health and Human  
4 Services 2018.
- 5 2. Organization WH. Global action plan on physical activity 2018–2030: more  
6 active people for a healthier world 2018 [Available from:  
7 <http://www.who.int/iris/handle/10665/272722>].
- 8 3. Miyachi M, Triplette J, Kawakami R, et al. "+10 min of Physical Activity per  
9 Day": Japan Is Looking for Efficient but Feasible Recommendations for Its  
10 Population. *J Nutr Sci Vitaminol (Tokyo)* 2015;61 Suppl:S7-9. doi:  
11 10.3177/jnsv.61.S7 [published Online First: 2015/11/26]
- 12 4. Nishi N. Monitoring Obesity Trends in Health Japan 21. *J Nutr Sci Vitaminol*  
13 *(Tokyo)* 2015;61 Suppl:S17-9. doi: 10.3177/jnsv.61.S17 [published Online First:  
14 2015/11/26]
- 15 5. The Ministry of Health LaWiJ. Guideline of financial incentives for health  
16 promotion 2016
- 17 6. Giles EL, Robalino S, McColl E, et al. The effectiveness of financial incentives  
18 for health behaviour change: systematic review and meta-analysis. *PLoS One*  
19 2014;9(3):e90347. doi: 10.1371/journal.pone.0090347 [published Online First:  
20 2014/03/13]
- 21 7. Harkins KA, Kullgren JT, Bellamy SL, et al. A Trial of Financial and Social  
22 Incentives to Increase Older Adults' Walking. *Am J Prev Med*  
23 2017;52(5):e123-e30. doi: 10.1016/j.amepre.2016.11.011 [published Online  
24 First: 2017/01/08]
- 25 8. Patel MS, Asch DA, Rosin R, et al. Individual Versus Team-Based Financial  
26 Incentives to Increase Physical Activity: A Randomized, Controlled Trial. *J Gen*  
27 *Intern Med* 2016;31(7):746-54. doi: 10.1007/s11606-016-3627-0 [published  
28  
29  
30  
31  
32  
33  
34  
35  
36  
37  
38  
39  
40  
41  
42  
43  
44  
45  
46  
47  
48  
49  
50  
51  
52  
53  
54  
55  
56  
57  
58  
59  
60

- 1 Online First: 2016/03/16]
- 2
- 3
- 4 1 Online First: 2016/03/16]
- 5
- 6 2 9. Arai H, Satake S. English translation of the Kihon Checklist. *Geriatr Gerontol*
- 7
- 8 3 *Int* 2015;15(4):518-9. doi: 10.1111/ggi.12397
- 9
- 10 4 10. Satake S, Senda K, Hong YJ, et al. Validity of the Kihon Checklist for
- 11
- 12 5 assessing frailty status. *Geriatr Gerontol Int* 2015 doi: 10.1111/ggi.12543
- 13
- 14 6 [published Online First: 2015/07/15]
- 15
- 16 7 11. Sewo Sampaio PY, Sampaio RA, Yamada M, et al. Validation and translation
- 17
- 18 8 of the Kihon Checklist (frailty index) into Brazilian Portuguese. *Geriatr*
- 19
- 20 9 *Gerontol Int* 2014;14(3):561-9. doi: 10.1111/ggi.12134
- 21
- 22 10 12. Fukutomi E, Okumiya K, Wada T, et al. Relationships between each category
- 23
- 24 11 of 25-item frailty risk assessment (Kihon Checklist) and newly certified older
- 25
- 26 12 adults under Long-Term Care Insurance: A 24-month follow-up study in a rural
- 27
- 28 13 community in Japan. *Geriatr Gerontol Int* 2015;15(7):864-71. doi:
- 29
- 30 14 10.1111/ggi.12360
- 31
- 32 15 13. Tomata Y, Hozawa A, Ohmori-Matsuda K, et al. [Validation of the Kihon
- 33
- 34 16 Checklist for predicting the risk of 1-year incident long-term care insurance
- 35
- 36 17 certification: the Ohsaki Cohort 2006 Study]. *Nihon Koshu Eisei Zasshi*
- 37
- 38 18 2011;58(1):3-13.
- 39
- 40 19 14. Fujii H, Yamamoto S, Takeda-Imai F, et al. Validity and applicability of a
- 41
- 42 20 simple questionnaire for the estimation of total and domain-specific physical
- 43
- 44 21 activity. *Diabetology International* 2011;2(2):47-54. doi:
- 45
- 46 22 10.1007/s13340-011-0025-z
- 47
- 48 23 15. Sasai H, Nakata Y, Murakami H, et al. Simultaneous Validation of Seven
- 49
- 50 24 Physical Activity Questionnaires Used in Japanese Cohorts for Estimating
- 51
- 52 25 Energy Expenditure: A Doubly Labeled Water Study. *J Epidemiol* 2018 doi:
- 53
- 54 26 10.2188/jea.JE20170129 [published Online First: 2018/05/02]
- 55
- 56 27 16. Communications MoIAa. Population Census 1996 [Available from:
- 57
- 58 28 <http://www.stat.go.jp/english/data/kokusei/index.html>.
- 59
- 60

(Study protocol R2)  
page. 29

- 1  
2  
3  
4 1 17. Tomata Y, Tanno K, Zhang S, et al. Subjective Household Economic Status and  
5  
6 2 Obesity in Toddlers: A Cross-Sectional Study of Daycare Centers in Japan.  
7  
8 3 *Journal of epidemiology* 2019;29(1):33-37. doi: 10.2188/jea.JE20170081  
9  
10 4 [published Online First: 2018/06/12]  
11  
12 5 18. Tomata Y, Tanno K, Zhang S, et al. Subjective Household Economic Status and  
13  
14 6 Obesity in Toddlers: A Cross-Sectional Study of Daycare Centers in Japan. *J*  
15  
16 7 *Epidemiol* 2018 doi: 10.2188/jea.JE20170081 [published Online First:  
17  
18 8 2018/06/12]  
19  
20 9 19. Kaiho Y, Sugawara Y, Sugiyama K, et al. Impact of Pain on Incident Risk of  
21  
22 10 Disability in Elderly Japanese: Cause-specific Analysis. *Anesthesiology*  
23  
24 11 2017;126(4):688-96. doi: 10.1097/aln.0000000000001540 [published Online  
25  
26 12 First: 2017/02/10]  
27  
28  
29  
30  
31  
32  
33  
34  
35  
36  
37  
38  
39  
40  
41  
42  
43  
44  
45  
46  
47  
48  
49  
50  
51  
52  
53  
54  
55  
56  
57  
58  
59  
60



1  
2  
3  
4  
5  
6  
7  
8  
9  
10  
11  
12  
13  
14  
15  
16  
17  
18  
19  
20  
21  
22  
23  
24  
25  
26  
27  
28  
29  
30  
31  
32  
33  
34  
35  
36  
37  
38  
39  
40  
41  
42  
43  
44  
45  
46  
47  
48  
49  
50  
51  
52  
53  
54  
55  
56  
57  
58  
59  
60

1 **Figure 1:** Flow chart of the study procedure.

For peer review only

1 **Table 1:** Time line for the evaluation.

| <b>Time line</b> | <b>Purpose of evaluation</b>             | <b>Hypothesis</b>                                                                                                                |
|------------------|------------------------------------------|----------------------------------------------------------------------------------------------------------------------------------|
| 1-3 weeks        | Baseline number of steps                 |                                                                                                                                  |
| 4-6 weeks        | Effect of incentive                      | Is the number of steps in the intervention group higher than that in the control group?                                          |
| 7-9 weeks        | Sustained effect of incentive            | Does the number of steps in the intervention group remain higher than that in the control group even after the incentive period? |
| 10-12 weeks      | Chance for waitlist control <sup>a</sup> |                                                                                                                                  |

a. Period for providing a chance of financial incentive for the waitlist control group. Thus, this period will not be included in the statistical analysis of this trial.

2

1 **Table 2:** Study outcomes.  
2  
3

| Measurement                                           | Definition                                                                                                  |
|-------------------------------------------------------|-------------------------------------------------------------------------------------------------------------|
| <b>Primary outcome</b>                                |                                                                                                             |
| – Increase in number of steps                         | Mean increase in the average number of steps (in 4-6 weeks or 7-9 weeks) compared with the baseline number. |
| <b>Secondary outcome</b>                              |                                                                                                             |
| – Proportion of participants who increase their steps | Proportion of participants who increase their average number of steps by 1,000 from the baseline.           |
| – Incident falls                                      | Incident rate of falls in 4-6 weeks or 7-9 weeks.                                                           |
| – Incident pain                                       | Incident rate of pain in 4-6 weeks or 7-9 weeks.                                                            |

20  
21  
22  
23  
24  
25  
26  
27  
28  
29  
30  
31  
32  
33  
34  
35  
36  
37  
38  
39  
40  
41  
42  
43  
44  
45  
46



1 SPIRIT 2013 Checklist: Recommended items to address in a clinical trial protocol and related documents

2 [Randomized controlled trial of a financial incentive for increasing the number of daily walking steps: Study protocol](#)

| Section/item                                              | Item No | Description                                                                                                                                                                                                                                                                                                                                                                    | Page, line     |
|-----------------------------------------------------------|---------|--------------------------------------------------------------------------------------------------------------------------------------------------------------------------------------------------------------------------------------------------------------------------------------------------------------------------------------------------------------------------------|----------------|
| <b>Administrative information</b>                         |         |                                                                                                                                                                                                                                                                                                                                                                                |                |
| Title                                                     | 1       | Descriptive title identifying the study design, population, interventions, and, if applicable, trial acronym                                                                                                                                                                                                                                                                   | Page 1, line 2 |
| Trial registration                                        | 2a      | Trial identifier and registry name. If not yet registered, name of intended registry                                                                                                                                                                                                                                                                                           | Page 4         |
|                                                           | 2b      | All items from the World Health Organization Trial Registration Data Set                                                                                                                                                                                                                                                                                                       | N/A            |
| Protocol version                                          | 3       | Date and version identifier                                                                                                                                                                                                                                                                                                                                                    | Page 1         |
| Funding                                                   | 4       | Sources and types of financial, material, and other support                                                                                                                                                                                                                                                                                                                    | Page 23        |
| Roles and responsibilities                                | 5a      | Names, affiliations, and roles of protocol contributors                                                                                                                                                                                                                                                                                                                        | Page 23        |
|                                                           | 5b      | Name and contact information for the trial sponsor                                                                                                                                                                                                                                                                                                                             | Page 23        |
|                                                           | 5c      | Role of study sponsor and funders, if any, in study design; collection, management, analysis, and interpretation of data; writing of the report; and the decision to submit the report for publication, including whether they will have ultimate authority over any of these activities                                                                                       |                |
|                                                           | 5d      | Composition, roles, and responsibilities of the coordinating centre, steering committee, endpoint adjudication committee, data management team, and other individuals or groups overseeing the trial, if applicable (see Item 21a for data monitoring committee)                                                                                                               | N/A            |
| <b>Introduction</b>                                       |         |                                                                                                                                                                                                                                                                                                                                                                                |                |
| Background and rationale                                  | 6a      | Description of research question and justification for undertaking the trial, including summary of relevant studies (published and unpublished) examining benefits and harms for each intervention                                                                                                                                                                             | Page 6         |
|                                                           | 6b      | Explanation for choice of comparators                                                                                                                                                                                                                                                                                                                                          | Page 6         |
| Objectives                                                | 7       | Specific objectives or hypotheses                                                                                                                                                                                                                                                                                                                                              | Page 7         |
| Trial design                                              | 8       | Description of trial design including type of trial (eg, parallel group, crossover, factorial, single group), allocation ratio, and framework (eg, superiority, equivalence, noninferiority, exploratory)                                                                                                                                                                      | Page 8         |
| <b>Methods: Participants, interventions, and outcomes</b> |         |                                                                                                                                                                                                                                                                                                                                                                                |                |
| Study setting                                             | 9       | Description of study settings (eg, community clinic, academic hospital) and list of countries where data will be collected. Reference to where list of study sites can be obtained                                                                                                                                                                                             | Page 8         |
| Eligibility criteria                                      | 10      | Inclusion and exclusion criteria for participants. If applicable, eligibility criteria for study centres and individuals who will perform the interventions (eg, surgeons, psychotherapists)                                                                                                                                                                                   | Page 8         |
| Interventions                                             | 11a     | Interventions for each group with sufficient detail to allow replication, including how and when they will be administered                                                                                                                                                                                                                                                     | Page 9         |
|                                                           | 11b     | Criteria for discontinuing or modifying allocated interventions for a given trial participant (eg, drug dose change in response to harms, participant request, or improving/worsening disease)                                                                                                                                                                                 | N/A            |
|                                                           | 11c     | Strategies to improve adherence to intervention protocols, and any procedures for monitoring adherence (eg, drug tablet return, laboratory tests)                                                                                                                                                                                                                              | N/A            |
|                                                           | 11d     | Relevant concomitant care and interventions that are permitted or prohibited during the trial                                                                                                                                                                                                                                                                                  | N/A            |
| Outcomes                                                  | 12      | Primary, secondary, and other outcomes, including the specific measurement variable (eg, systolic blood pressure), analysis metric (eg, change from baseline, final value, time to event), method of aggregation (eg, median, proportion), and time point for each outcome. Explanation of the clinical relevance of chosen efficacy and harm outcomes is strongly recommended | Page 18        |
| Participant timeline                                      | 13      | Time schedule of enrolment, interventions (including any run-ins and washouts), assessments, and visits for participants. A schematic diagram is highly recommended (see Figure)                                                                                                                                                                                               | Page 10        |
| Sample size                                               | 14      | Estimated number of participants needed to achieve study objectives and how it was determined, including clinical and statistical assumptions supporting any sample size calculations                                                                                                                                                                                          | Page 12        |
| Recruitment                                               | 15      | Strategies for achieving adequate participant enrolment to reach target sample size                                                                                                                                                                                                                                                                                            | Page 8         |

**Methods: Assignment of interventions (for controlled trials)****Allocation:**

|                                  |     |                                                                                                                                                                                                                                                                                                                                                          |         |
|----------------------------------|-----|----------------------------------------------------------------------------------------------------------------------------------------------------------------------------------------------------------------------------------------------------------------------------------------------------------------------------------------------------------|---------|
| Sequence generation              | 16a | Method of generating the allocation sequence (eg, computer-generated random numbers), and list of any factors for stratification. To reduce predictability of a random sequence, details of any planned restriction (eg, blocking) should be provided in a separate document that is unavailable to those who enrol participants or assign interventions | Page 13 |
| Allocation concealment mechanism | 16b | Mechanism of implementing the allocation sequence (eg, central telephone; sequentially numbered, opaque, sealed envelopes), describing any steps to conceal the sequence until interventions are assigned                                                                                                                                                | Page 13 |
| Implementation                   | 16c | Who will generate the allocation sequence, who will enrol participants, and who will assign participants to interventions                                                                                                                                                                                                                                | Page 13 |
| Blinding (masking)               | 17a | Who will be blinded after assignment to interventions (eg, trial participants, care providers, outcome assessors, data analysts), and how                                                                                                                                                                                                                | Page 14 |
|                                  | 17b | If blinded, circumstances under which unblinding is permissible, and procedure for revealing a participant's allocated intervention during the trial                                                                                                                                                                                                     | N/A     |

**Methods: Data collection, management, and analysis**

|                         |     |                                                                                                                                                                                                                                                                                                                                                                                                              |         |
|-------------------------|-----|--------------------------------------------------------------------------------------------------------------------------------------------------------------------------------------------------------------------------------------------------------------------------------------------------------------------------------------------------------------------------------------------------------------|---------|
| Data collection methods | 18a | Plans for assessment and collection of outcome, baseline, and other trial data, including any related processes to promote data quality (eg, duplicate measurements, training of assessors) and a description of study instruments (eg, questionnaires, laboratory tests) along with their reliability and validity, if known. Reference to where data collection forms can be found, if not in the protocol | Page 14 |
|                         | 18b | Plans to promote participant retention and complete follow-up, including list of any outcome data to be collected for participants who discontinue or deviate from intervention protocols                                                                                                                                                                                                                    | N/A     |
| Data management         | 19  | Plans for data entry, coding, security, and storage, including any related processes to promote data quality (eg, double data entry; range checks for data values). Reference to where details of data management procedures can be found, if not in the protocol                                                                                                                                            | Page 14 |
| Statistical methods     | 20a | Statistical methods for analysing primary and secondary outcomes. Reference to where other details of the statistical analysis plan can be found, if not in the protocol                                                                                                                                                                                                                                     | Page 19 |
|                         | 20b | Methods for any additional analyses (eg, subgroup and adjusted analyses)                                                                                                                                                                                                                                                                                                                                     | Page 19 |
|                         | 20c | Definition of analysis population relating to protocol non-adherence (eg, as randomised analysis), and any statistical methods to handle missing data (eg, multiple imputation)                                                                                                                                                                                                                              | Page 19 |

**Methods: Monitoring**

|                 |     |                                                                                                                                                                                                                                                                              |         |
|-----------------|-----|------------------------------------------------------------------------------------------------------------------------------------------------------------------------------------------------------------------------------------------------------------------------------|---------|
| Data monitoring | 21a | Composition of data monitoring committee (DMC); summary of its role and reporting structure; statement of whether it is independent from the sponsor and competing interests; and reference to where further details about its charter can be found, if not in the protocol. | Page 20 |
|                 |     | Alternatively, an explanation of why a DMC is not needed                                                                                                                                                                                                                     | Page 20 |
|                 | 21b | Description of any interim analyses and stopping guidelines, including who will have access to these interim results and make the final decision to terminate the trial                                                                                                      | N/A     |
| Harms           | 22  | Plans for collecting, assessing, reporting, and managing solicited and spontaneously reported adverse events and other unintended effects of trial interventions or trial conduct                                                                                            | Page 20 |
| Auditing        | 23  | Frequency and procedures for auditing trial conduct, if any, and whether the process will be independent from investigators and the sponsor                                                                                                                                  | N/A     |

| <b>Ethics and dissemination</b> |     |                                                                                                                                                                                                                                                                                     |         |
|---------------------------------|-----|-------------------------------------------------------------------------------------------------------------------------------------------------------------------------------------------------------------------------------------------------------------------------------------|---------|
| Research ethics approval        | 24  | Plans for seeking research ethics committee/institutional review board (REC/IRB) approval                                                                                                                                                                                           | Page 20 |
| Protocol amendments             | 25  | Plans for communicating important protocol modifications (eg, changes to eligibility criteria, outcomes, analyses) to relevant parties (eg, investigators, REC/IRBs, trial participants, trial registries, journals, regulators)                                                    | Page 20 |
| Consent or assent               | 26a | Who will obtain informed consent or assent from potential trial participants or authorised surrogates, and how (see Item 32)                                                                                                                                                        | Page 20 |
|                                 | 26b | Additional consent provisions for collection and use of participant data and biological specimens in ancillary studies, if applicable                                                                                                                                               | N/A     |
| Confidentiality                 | 27  | How personal information about potential and enrolled participants will be collected, shared, and maintained in order to protect confidentiality before, during, and after the trial                                                                                                | Page 20 |
| Declaration of interests        | 28  | Financial and other competing interests for principal investigators for the overall trial and each study site                                                                                                                                                                       | Page 23 |
| Access to data                  | 29  | Statement of who will have access to the final trial dataset, and disclosure of contractual agreements that limit such access for investigators                                                                                                                                     | Page 14 |
| Ancillary and post-trial care   | 30  | Provisions, if any, for ancillary and post-trial care, and for compensation to those who suffer harm from trial participation                                                                                                                                                       | N/A     |
| Dissemination policy            | 31a | Plans for investigators and sponsor to communicate trial results to participants, healthcare professionals, the public, and other relevant groups (eg, via publication, reporting in results databases, or other data sharing arrangements), including any publication restrictions | Page 21 |
|                                 | 31b | Authorship eligibility guidelines and any intended use of professional writers                                                                                                                                                                                                      | Page 23 |
|                                 | 31c | Plans, if any, for granting public access to the full protocol, participant-level dataset, and statistical code                                                                                                                                                                     | N/A     |
| <b>Appendices</b>               |     |                                                                                                                                                                                                                                                                                     |         |
| Informed consent materials      | 32  | Model consent form and other related documentation given to participants and authorised surrogates                                                                                                                                                                                  | N/A     |
| Biological specimens            | 33  | Plans for collection, laboratory evaluation, and storage of biological specimens for genetic or molecular analysis in the current trial and for future use in ancillary studies, if applicable                                                                                      | N/A     |

\*It is strongly recommended that this checklist be read in conjunction with the SPIRIT 2013 Explanation & Elaboration for important clarification on the items. Amendments to the protocol should be tracked and dated. The SPIRIT checklist is copyrighted by the SPIRIT Group under the Creative Commons "Attribution-NonCommercial-NoDerivs 3.0 Unported" license.
